# Supplementary material for: The metazoan history of the COE transcription factors. Selection of a variant HLH motif by mandatory inclusion of a duplicated exon in vertebrates
Source: PubMed Central journal article supplement (PMC2394523; doi:10.1186/1471-2148-8-131), 2008-05-02
Supplement: 1471-2148-8-131-S1.pdf [file 1471-2148-8-131-S1.pdf]

## GNATHOSTOMES

## DBD

|                 |       |            |             |            |        |            |              |         |       |       |            |            |            |            |            |
|-----------------|-------|------------|-------------|------------|--------|------------|--------------|---------|-------|-------|------------|------------|------------|------------|------------|
| COE1            |       |            |             |            |        |            |              |         |       |       |            |            |            |            |            |
| Mm              | COE1  | -----      | -M-FGIQES-  | -----      | I-QRS  | G-SSMKEE   | P L-GS-      | GMN     | --AVR | TWMQ  | GAGVLDANTA | AQSGVGLARA | HFEKQPPSNL | RKSNFFHFVL |            |
| Hs              | COE1  | -----      | -M-FGIQES-  | -----      | I-QRS  | G-SSMKEE   | P L-GS-      | GMN     | --AVR | TWMQ  | GAGVLDANTA | AQSGVGLARA | HFEKQPPSNL | RKSNFFHFVL |            |
| Md              | COE1  | -----      | -M-FGIQES-  | -----      | I-QRS  | G-SSMKEE   | P L-GS-      | GMN     | --AVR | TWMQ  | GAGVLDANTA | AQSGVGLARA | HFEKQPPSNL | RKSNFFHFVL |            |
| Xt              | COE1  | -----      | -----       | -----      | -----  | -----      | -----        | -----   | ----- | ----- | -----      | -----      | -----      | -----      |            |
| Dr              | COE1  | -----      | -M-FGIQDS-  | -----      | I-QRS  | G-SSMKEE   | P I-GA-      | GMN     | --AVR | TWMQ  | GAGVLDANTA | AQSGVGLARA | HFEKQPPSNL | RKSNFFHFVL |            |
| COE2            |       |            |             |            |        |            |              |         |       |       |            |            |            |            |            |
| Mm              | COE2  | -----      | -M-FGIQDT-  | -----      | L-GR-  | G-PALKDK-  | S L-GA-      | EMD     | --SVR | SWVR  | NVGVVDANVA | AQSGVALSRA | HFEKQPPSNL | RKSNFFHFVL |            |
| Hs              | COE2  | -----      | -M-FGIQDT-  | -----      | L-GR-  | G-PTLKEK-  | S L-GA-      | EMD     | --SVR | SWVR  | NVGVVDANVA | AQSGVALSRA | HFEKQPPSNL | RKSNFFHFVL |            |
| Xt              | COE2  | -----      | -M-FGVQDT-  | -----      | L-ARS  | G-TALRDK-  | A L-GV-      | GMD     | --PVR | SWVR  | NVGVVDAKVA | AQSGVAVSRA | HFEKQPPSNL | RKSNFFHFVL |            |
| Dr              | COE2  | -----      | -M-FESQDH-  | -----      | S-IRT  | I-TELKVR-  | T F-EE-      | EMD     | --PVR | SWVR  | NVGVIDANIA | AQSGVALSRA | HFEKQPPSNL | RKSNFFHFVL |            |
| COE3            |       |            |             |            |        |            |              |         |       |       |            |            |            |            |            |
| Mm              | COE3  | -----      | -M-FGIQEN-  | -----      | I-PRG  | G-TTMKEE-  | P L-GS-      | GMN     | --PVR | SWMH  | TAGVVDANTA | AQSGVGLARA | HFEKQPPSNL | RKSNFFHFVL |            |
| Hs              | COE3  | -----      | -M-FGIQEN-  | -----      | I-PRG  | G-TTMKEE-  | P L-GS-      | GMN     | --PVR | SWMH  | TAGVVDANTA | AQSGVGLARA | HFEKQPPSNL | RKSNFFHFVL |            |
| Xt              | COE3  | -----      | -M-FGIQEN-  | -----      | I-PRG  | G-TTMKEE-  | P L-GG-      | GMN     | --PVR | SWMH  | TAGVVDANTA | AQSGVGLARA | HFEKQPPSNL | RKSNFFHFVL |            |
| Dr              | COE3  | -----      | -M-FGIQEN-  | -----      | I-PRG  | G-TTMKEE-  | P L-GS-      | GMN     | --PVR | SWMH  | TAGVVDANTA | AQSGVGLARA | HFEKQPPSNL | RKSNFFHFVL |            |
| EBF4            |       |            |             |            |        |            |              |         |       |       |            |            |            |            |            |
| Mm              | EBF4  | -----      | -M-FPAQDA-  | -----      | L-PRG  | G-LHLKEE-  | P LLPS-      | SLG     | --SVR | SWMQ  | SAGILDSNTA | AQSGVGLARA | HFEKQPPSNL | RKSNFFHFVL |            |
| Hs              | EBF4  | -----      | -----       | -----      | L-PRS  | G-LNLKEE-  | P LLPA-      | GLG     | --SVR | SWMQ  | GAGILDASTA | AQSGVGLARA | HFEKQPPSNL | RKSNFFHFVL |            |
| Md              | EBF4  | -----      | -M-FSMQDS-  | -----      | L-PRG  | G-LSLKEE-  | P L-PA-      | GLG     | --SVR | SWMQ  | GTGILDATTA | AQSGVGLARA | HFEKQPPSNL | RKSNFFHFVL |            |
| Unassigned      |       |            |             |            |        |            |              |         |       |       |            |            |            |            |            |
| Dr              | COE   | -----      | -----       | -----      | ---    | --MKQE-    | V R-GS-      | SAG     | --SAV | SWLH  | THSSL--ST- | -QRD       | VGLARA     | HFEKQPPANL | RKSNFFHFVL |
| LAMPREYS        |       |            |             |            |        |            |              |         |       |       |            |            |            |            |            |
| Pm              | COE-A | -----      | -M-FGIQES-  | -----      | L-PRG  | G-SGLKEE-  | P L-GG-      | GMP     | --TVR | SWMH  | S-GVVDASTA | AQSGIALARA | HFEKQPPSNL | RKSNFFHFVL |            |
| NON-VERTEBRATES |       |            |             |            |        |            |              |         |       |       |            |            |            |            |            |
| Ci              | COE   | -----      | -----       | -----      | ---    | ---        | ---          | ---     | ---   | ---   | ---        | ---        | VGLHRA     | HFEKQPPNLL | RKSNFFHFVL |
| Bf              | COE   | -----      | -----       | -----      | L-PRG  | T-TTLKEE-  | P L-GS-      | QIG     | --SVR | NWMQ  | P-SIVDQT-A | TSGSVGLARA | HFEKQPPSNL | RKSNFFHFVI |            |
| Lg              | COE   | -----      | -M-FVT-     | -----      | D-QET  | T-SPMKEE-  | S L-GS-      | QLS     | --AVR | NWMQ  | PT-VLDQN-- | --GSVGLSRA | HFEKQPPSNL | RKSNFFHFVL |            |
| Cc              | COE   | -----      | -M-FSLQDS-  | -----      | L-QPRG | P-LSMKEE-  | P L-GAPQAPLG | ---     | ---   | ---   | ---        | ---        | ATASVGLGRA | HFEKQPPSNL | RKSNFFHFVL |
| Dm              | COE   | MEWGRKLYPS | AVSGPSRSAGG | LM-FGLPPTA | AVDMNQ | PRG        | PMTSLKEE-    | P L-GS- | ---   | ---   | RWAM       | QP-VVDQ--- | --SNLIGIRA | HFEKQPPSNL | RKSNFFHFVI |
| Nv              | COE   | -----      | -MSFDMQE-   | -----      | D---   | E-NSMKNDRP | V-V-         | ---     | ---   | ---   | GCLQ       | HR-VLEPQVT | STASGLLARC | HFEKQPPANL | RKSNFFHFVL |

## DBD

## GNATHOSTOMES

|                 |       |            |            |       |       |             |            |            |             |            |            |            |            |
|-----------------|-------|------------|------------|-------|-------|-------------|------------|------------|-------------|------------|------------|------------|------------|
| COE1            |       |            |            |       |       |             |            |            |             |            |            |            |            |
| Mm              | COE1  | ALYDRQGQPV | EIERTAFVGF | VEKEK | ---E  | ANSEKTNNGI  | HYRLQLLYSN | GIRTEQDFYV | RLIDSMTKQA  | IYVEGQDKNP | EMCRVLLT-- | -HEIMCSRCC | DKKSCGNRNE |
| Hs              | COE1  | ALYDRQGQPV | EIERTAFVGF | VEKEK | ---E  | ANSEKTNNGI  | HYRLQLLYSN | GIRTEQDFYV | RLIDSMTKQA  | IYVEGQDKNP | EMCRVLLT-- | -HEIMCSRCC | DKKSCGNRNE |
| Md              | COE1  | ALYDRQGQPV | EIERTAFVGF | VEKEK | ---E  | ANSEKTNNGI  | HYRLQLLYSN | GIRTEQDFYV | RLIDSMTKQA  | IYVEGQDKNP | EMCRVLLT-- | -HEIMCSRCC | DKKSCGNRNE |
| Xt              | COE1  | -----      | -----      | ----- | ---   | ---         | ---        | ---        | ---         | ---        | ---        | ---        | ---        |
| Dr              | COE1  | ALYDRQGQPV | EIERTSFVGF | VEKEK | ---A  | RIGEKTNNGI  | HYRLQLLYSN | GIRTEQDFYV | RLIDSMTKQA  | IYVEGQDKNP | EMLTALFLSS | SPSVSISRCC | DKKSCGNRNE |
| COE2            |       |            |            |       |       |             |            |            |             |            |            |            |            |
| Mm              | COE2  | ALYDRQGQPV | EIERTAFVDF | VENDK | ---E  | QGNEKTNNGT  | HYKLQLLYSN | GVRTEQDLYV | RLIDSVTQKQ  | IAYEGQNKNP | EMCRVLLT-- | -HEVMCSRCC | EKKSCGNRNE |
| Hs              | COE2  | ALYDRQGQPV | EIERTAFVDF | VENDK | ---E  | QGNEKTNNGT  | HYKLQLLYSN | GVRTEQDLYV | RLIDSVTQKQ  | IAYEGQNKNP | EMCRVLLT-- | -HEVMCSRCC | EKKSCGNRNE |
| Xt              | COE2  | ALYDRQGQPI | EIERTAFVDF | VENEK | ---E  | LSTEKTNNGT  | HYKLQLLYSN | GVRTEQDLYV | RLIDSVTQKQ  | IAYEGQNKNP | EMCRVLLT-- | -HEVMCSRCC | EKKSCGNRNE |
| Dr              | COE2  | ALYDRNGQPV | EVERTSFVDF | VEQDK | ---   | -TGEKTNNGT  | HYKLQLLYSN | GVRTEQDLYA | RLIDSVTQKQ  | ISYEGQNKNP | EMCRVLLT-- | -HEVMCSRCC | EKKSCGNRNE |
| COE3            |       |            |            |       |       |             |            |            |             |            |            |            |            |
| Mm              | COE3  | ALYDRQGQPV | EIERTAFVDF | VEKEK | ---E  | PNNEKTNNGI  | HYKLQLLYSN | GVRTEQDLYV | RLIDSMTKQA  | IYVEGQDKNP | EMCRVLLT-- | -HEIMCSRCC | DKKSCGNRNE |
| Hs              | COE3  | ALYDRQGQPV | EIERTAFVDF | VEKEK | ---E  | PNNEKTNNGI  | HYKLQLLYSN | GVRTEQDLYV | RLIDSMTKQA  | IYVEGQDKNP | EMCRVLLT-- | -HEIMCSRCC | DKKSCGNRNE |
| Xt              | COE3  | ALYDRQGQPV | EIERTAFVDF | VEKDK | ---E  | PNSEKTNNGI  | HYKLQLLYSN | GVRTEQDLYV | RLIDSMTKQA  | IYVEGQDKNP | EMCRVLLT-- | -HEIMCSRCC | DKKSCGNRNE |
| Dr              | COE3  | ALYDRQGQPV | EIERTAFVDF | VEKEK | ---E  | PNSEKTNNGI  | HYKLQLLYSN | GVRTEQDLYV | RLIDSMTKQA  | IYVEGQDKNP | EMCRVLLT-- | -HEIMCSRCC | DKKSCGNRNE |
| EBF4            |       |            |            |       |       |             |            |            |             |            |            |            |            |
| Mm              | EBF4  | AMYDRQGQPV | EVERTAFIDF | VEKDR | ---E  | PGTEKTNNGI  | HYRLRLVYNN | GLRTEQDLYV | RLIDSMSKQA  | IYVEGQDKNP | EMCRVLLT-- | -HEIMCSRCC | DRKSCGNRNE |
| Hs              | EBF4  | AMYDRQGQPV | EVERTAFIDF | VEKDR | ---E  | PGAETNNGI   | HYRLRLVYNN | GLRTEQDLYV | RLIDSMSKQA  | IYVEGQDKNP | EMCRVLLT-- | -HEIMCSRCC | DRKSCGNRNE |
| Md              | EBF4  | AMYDRQGQPV | EIERTAFIDF | VEKER | ---E  | PSGERTNNGI  | HYRLQLLYSN | GIRTEQDLYV | RLIDSMSKQA  | IYVEGQDKNP | EMCRVLLT-- | -HEIMCSRCC | DKKSCGNRNE |
| Unassigned      |       |            |            |       |       |             |            |            |             |            |            |            |            |
| Dr              | COE   | ALYDSQGQSV | EIEQTTFVDF | VEKDK | ---E  | PVSEKTNNGI  | HYKLQLLYNN | GVRTEQDLYI | RLIDSVTKQA  | IVFEGQDKNP | EMCRVLLT-- | -HETMCSRCC | DKKSCGNRNE |
| LAMPREYS        |       |            |            |       |       |             |            |            |             |            |            |            |            |
| Pm              | COE-A | ALYDRQGQPV | EIERTAFVDF | VEKDR | ---E  | PNSEKTNNGI  | HYRLQLLYSN | GVRTEQDLYV | RLIDSMTKQX  | XXXXXXXXXX | XXXXXXXXXX | -XXXXXSRCC | DKKSCGNRNE |
| NON-VERTEBRATES |       |            |            |       |       |             |            |            |             |            |            |            |            |
| Ci              | COE   | ALYDRQGQPV | EIERSAFVGF | VENET | ---E  | IAGEKTNNGI  | QYRLQLLYHS | GVRTEQDVVF | RLIDSATKQS  | ITYEGQDKNP | EMRRVLLT-- | -HEIMCSRCC | DKKSCGNRNE |
| Bf              | COE   | ALYDRQGQPV | EIERTAFIDF | VEKDR | ISPOE | TAGENTRNNGI | HYRLQLLYSN | GVRTEQDLYV | RLIDSMTKQA  | IYVEGQDKNP | EMQVLLT--  | -HEIMCSRCC | DKKSCGNRNE |
| Lg              | COE   | ALYDRQGQPV | EIERTAFIDF | VEKDO | ---E  | HESQKTNNGI  | HYRLQLLYSN | GVRQEIEYV  | RLIDSVSKQA  | IYVEGQDKNP | EMCRVLLT-- | -HEVMCSRCC | DKKSCGNRNE |
| Cc              | COE   | ALYDRQGQPV | EVERTAFIDF | VEKER | ---E  | PEG-KTNNGI  | HYRLQLLYAN | GVRQEQDLYV | RLIDSVTQKQA | IYVEGQDKNP | EMCRCLLT-- | -HEIMCSRCC | DKKSCGNRNE |
| Dm              | COE   | ALYDRAGQPI | EIERTAFIGF | IEKDS | ---E  | SDATKTNNGI  | QYRLQLLYAN | GARQEQDIFV | RLIDSVTQKQA | IYVEGQDKNP | EMCRVLLT-- | -HEVMCSRCC | DKKSCGNRNE |
| Nv              | COE   | AFFDHNGQAV | EIERASFIDF | IEHLP | ---E  | --DKNVRNGV  | LYRVLLLYSN | GIRTEQDIFV | RLIDAATKI   | VPYEGQDKNP | EMRRVLLT-- | -HEVMCSRCC | EKKSCGNRNE |

## DBD

## GNATHOSTOMES

|      |      |            |           |            |            |            |            |            |         |           |       |       |       |      |
|------|------|------------|-----------|------------|------------|------------|------------|------------|---------|-----------|-------|-------|-------|------|
| COE1 |      |            |           |            |            |            |            |            |         |           |       |       |       |      |
| Mm   | COE1 | TPSDPVIIDR | FFLKFFLKC | QNCLKNAGNP | RDMRRFQVVV | STTVNVGDHV | LAVSDNMFVH | NNSKHGRRAR | RL-DPSE | GT-PSYLEH | ----- | ----- | ----- | ATPC |

|    |                 |            |            |            |            |            |            |            |            |         |            |            |            |        |      |
|----|-----------------|------------|------------|------------|------------|------------|------------|------------|------------|---------|------------|------------|------------|--------|------|
| Hs | COE1            | TPSDPVIIDR | FFLKFFLKC  | QNCLKNAGNP | RDMMRFQVVV | STTVNVDGHV | LAVSDNMFVH | NNSKHGRRAR | RL         | DPSEGT- | PSYLEH---- | -----      | -----      | ATPC   |      |
| Md | COE1            | TPSDPVIIDR | FFLKFFLKC  | QNCLKNAGNP | RDMMRFQVVV | STTVNVDGHV | LAVSDNMFVH | NNSKHGRRAR | RL         | DPSEGT- | PSYLEH---- | -----      | -----      | ATPC   |      |
| Xt | COE1            | -----      | FFLKFFLKC  | QNCLKNAGNP | RDMMRFQVVV | STTVNVDGHV | LAVSDNMFVH | NNSKHGRRAR | RL         | DPSEGT- | PSYLEHEA-- | -----      | -----      | ATPC   |      |
| Dr | COE1            | TPSDPVIIDR | FFLKFFLKC  | QNCLKNAGNP | RDMMRFQVVV | STTVSVDGHV | LAVSDNMFVH | NNSKHGRRAR | RL         | DPSEGT- | PSYLEH---- | -----      | -----      | ATPC   |      |
|    | COE2            |            |            |            |            |            |            |            |            |         |            |            |            |        |      |
| Mm | COE2            | TPSDPVIIDR | FFLKFFLKC  | QNCLKTAGNP | RDMMRFQVVL | STTVNVDGHV | LAVSDNMFVH | NNSKHGRRAR | RL         | DPSE--- | -----      | -----      | -----      | ATPC   |      |
| Hs | COE2            | TPSDPVIIDR | FFLKFFLKC  | QNCLKTAGNP | RDMMRFQVVL | STTVNVDGHV | LAVSDNMFVH | NNSKHGRRAR | RL         | DPSE--- | -----      | -----      | -----      | ATPC   |      |
| Xt | COE2            | TPSDPVIIDR | FFLKFFLKC  | QNCLKTAGNP | RDMMRFQVVL | STTVNVDGHV | LAVSDNMFVH | NNSKHGRRAR | RL         | DPSE--- | -----      | -----      | -----      | ATPC   |      |
| Dr | COE2            | TPSDPVIIDR | FFLKFFLKC  | QNCLKTAGNP | RDMMRFQVVL | STTVSVDGPV | LAISDNMFVH | NNSKHGRRSR | RM         | DPNETV- | ENNMEY---- | -----      | -----      | ATPC   |      |
|    | COE3            |            |            |            |            |            |            |            |            |         |            |            |            |        |      |
| Mm | COE3            | TPSDPVIIDR | FFLKFFLKC  | QNCLKNAGNP | RDMMRFQVVV | STTVNVDGHV | LAVSDNMFVH | NNSKHGRRAR | RL         | DPSE--- | -----      | -----      | -----      | ATPC   |      |
| Hs | COE3            | TPSDPVIIDR | FFLKFFLKC  | QNCLKNAGNP | RDMMRFQVVV | STTVNVDGHV | LAVSDNMFVH | NNSKHGRRAR | RL         | DPSEGT- | PSYLEN---- | -----      | -----      | ATPC   |      |
| Xt | COE3            | TPSDPVIIDR | FFLKFFLKC  | QNCLKNAGNP | RDMMRFQVVV | STTVNVDGHV | LAVSDNMFVH | NNSKHGRRAR | RL         | DPSEGT- | PSYLENV--- | -----      | -----      | ATPC   |      |
| Dr | COE3            | TPSDPVIIDR | FFLKFFLKC  | QNCLKNAGNP | RDMMRFQVVV | STTVNVDGHV | LAVSDNMFVH | NNSKHGRRAR | RL         | DPSEGT- | TPYLENA--- | -----      | -----      | ATPC   |      |
|    | EBF4            |            |            |            |            |            |            |            |            |         |            |            |            |        |      |
| Mm | EBF4            | TPSDPVIIDR | FFLKFFLKC  | QNCLKNAGNP | RDMMRFQVVV | STTVSVDGHV | LAVSDNMFVH | NNSKHGRRAR | RL         | DPSEA-- | -----      | -----      | -----      | ATPC   |      |
| Hs | EBF4            | TPSDPVIIDR | FFLKFFLKC  | QNCLKNAGNP | RDMMRFQVVV | STTVSVDGHV | LAVSDNMFVH | NNSKHGRRAR | RL         | DPSEA-- | -----      | -----      | -----      | ATPC   |      |
| Md | EBF4            | TPSDPVIIDR | FFLKFFLKC  | QNCLKNAGNP | RDMMRFQVVV | STTVSVDGHV | LAVSDNMFVH | NNSKHGRRAR | RL         | DPSEA-- | -----      | -----      | -----      | ATPC   |      |
|    | Unassigned      |            |            |            |            |            |            |            |            |         |            |            |            |        |      |
|    | DrCOE           | TPSDPVIIDR | FFLKFFLKC  | QNCLKNAGNP | RDTRRFQVLV | STTASVKAHI | LAISDNMFVH | NNSKHGRRAR | RF         | ELIEA-- | -----      | -----      | -----      | EIPC   |      |
|    | LAMPREYS        |            |            |            |            |            |            |            |            |         |            |            |            |        |      |
|    | PmCOE-A         | TPSDPVIIDR | FFLKFFLKC  | QNCLKNAGNP | RDMMRFQVVV | STTVHVDGHV | LAVSDNMFVH | NNSKHGRRAR | RI         | DPSE--- | -----      | -----      | -----      | ATPC   |      |
|    | NON-VERTEBRATES |            |            |            |            |            |            |            |            |         |            |            |            |        |      |
|    | Ci              | COE        | TPSDPVVIDR | YFLKFFLKC  | QNCLKNAGNP | RDMMRFQVVV | STTVHVDGHV | LAVSDNMFVH | NNSKHGRRAR | RV      | DPSE---    | -----      | -----      | ASPT   |      |
|    | Bf              | COE        | TPSDPVVIDR | FFLKAFLKC  | QNCLKNAGNP | RDMMRFQVVI | ATTNVDGHV  | LAVSDNMFVH | NNSKHGRRAR | RL      | DPSEGE     | MSFCGDSPI  | NRGQK----  | -----  | ATPC |
|    | Lg              | COE        | TPSDPVVIDR | FFLKFFMCK  | QNCLKNAGNP | RDMMRFQVAV | STSVADGPL  | LTISDNMFVH | NNSKHGRRAR | RL      | DPTEGGD    | LRFSHLRPKL | SPFAA----  | -----  | TTPC |
|    | Cc              | COE        | TPSDPVVIDR | FFLKFFMCK  | QNCLKNAGNP | RDMMRFQVSI | GTSSSVEGPL | LAVSDNMFVH | NNSKHGRRAR | RL      | DPGDAGF    | LCA-----   | -----      | -----  | ATPT |
|    | Dm              | COE        | TPSDPVVIDR | FFLKFFLKC  | QNCLKNAGNP | RDMMRFQVVI | STQVAVDGPL | LAISDNMFVH | NNSKHGRRAR | RL      | DTTEGTG    | NTSLSISGHP | LAPDSTYDGL | YPPLPV | ATPC |
|    | Nv              | COE        | TPSDPVVIDR | YCLKFFMCK  | QNCLKNAGNP | KDMMRFQVHV | STSDPVMYGM | IACSDNMFVH | NNSKHGRRAR | SR      | ADGNEQDT   | SA-----    | -----      | -----  | DDPC |

## GNATHOSTOMES

## IPT

## H1

| GNATHOSTOMES    |       | IPT        |            |            |            |            |            |            |            |    |          | H1         |             |  |
|-----------------|-------|------------|------------|------------|------------|------------|------------|------------|------------|----|----------|------------|-------------|--|
| COE1            |       |            |            |            |            |            |            |            |            |    |          |            |             |  |
| Mm              | COE1  | IKAISPSEGW | TTGGATVII  | GDNFFDGLQV | IFGTMLVWSE | LITPHAIRVQ | TPPRHIPGVV | EVTLSYKSKQ | FCKGTPGRFI | YT | ALNEPTI  | DYGFQRLQKV | IPRHGDDPER  |  |
| Hs              | COE1  | IKAISPSEGW | TTGGATVII  | GDNFFDGLQV | IFGTMLVWSE | LITPHAIRVQ | TPPRHIPGVV | EVTLSYKSKQ | FCKGTPGRFI | YT | ALNEPTI  | DYGFQRLQKV | IPRHGDDPER  |  |
| Md              | COE1  | IKAISPSEGW | TTGGATVII  | GDNFFDGLQV | IFGTMLVWSE | LITPHAIRVQ | TPPRHIPGVV | EVTLSYKSKQ | FCKGTPGRFI | YT | ALNEPTI  | DYGFQRLQKV | IPRHGDDPER  |  |
| Xt              | COE1  | IKAISPSEGW | TTGGATVII  | GDNFFDGLQV | IFGTMLVWSE | LITPHAIRVQ | TPPRHIPGVV | EVTLSYKSKQ | FCKGTPGRFI | YT | ALNEPTI  | DYGFQRLQKV | IPRHGDDPER  |  |
| Dr              | COE1  | IKAISPSEGW | TTGGATVII  | GDNFFDGLQV | IFGTMLVWSE | LITPHAIRVQ | TPPRHIPGVV | EVTLSYKSKQ | FCKGTPGRFI | YT | ALNEPTI  | DYGFQRLQKV | IPRHGDDPER  |  |
| COE2            |       |            |            |            |            |            |            |            |            |    |          |            |             |  |
| Mm              | COE2  | IKAISPSEGW | TTGGAMVII  | GDNFFDGLQV | VFGTMLVWSE | LITPHAIRVQ | TPPRHIPGVV | EVTLSYKSKQ | FCKGAPGRFI | YT | ALNEPTI  | DYGFQRLQKV | IPRHGDDPER  |  |
| Hs              | COE2  | IKAISPSEGW | TTGGAMVII  | GDNFFDGLQV | VFGTMLVWSE | LITPHAIRVQ | TPPRHIPGVV | EVTLSYKSKQ | FCKGAPGRFI | YT | ALNEPTI  | DYGFQRLQKV | IPRHGDDPER  |  |
| Xt              | COE2  | IKAISPSEGW | TTGGAMVII  | GDNFFDGLQV | VFGTMLVWSE | LITPHAIRVQ | TPPRHIPGVV | EVTLSYKSKQ | FCKGAPGRFI | YT | ALNEPTI  | DYGFQRLQKV | IPRHGDDPER  |  |
| Dr              | COE2  | IKAISPSEGW | TTGGAMVII  | GENFFDGLQV | VFGSMLVWSE | LITPHAIRVQ | TPPRHIPGVV | EVTLSYKSKQ | FCKGAPGRFI | YT | ALNEPTI  | DYGFQRLQKL | IPRHGDDPK   |  |
| COE3            |       |            |            |            |            |            |            |            |            |    |          |            |             |  |
| Mm              | COE3  | IKAISPSEGW | TTGGATVII  | GDNFFDGLQV | VFGTMLVWSE | LITPHAIRVQ | TPPRHIPGVV | EVTLSYKSKQ | FCKGAPGRFV | YT | ALNEPTI  | DYGFQRLQKV | IPRHGDDPER  |  |
| Hs              | COE3  | IKAISPSEGW | TTGGATVII  | GDNFFDGLQV | VFGTMLVWSE | LITPHAIRVQ | TPPRHIPGVV | EVTLSYKSKQ | FCKGAPGRFV | YT | ALNEPTI  | DYGFQRLQKV | IPRHGDDPER  |  |
| Xt              | COE3  | IKAISPSEGW | TTGGATVII  | GDNFFDGLQV | VFGTMLVWSE | LITPHAIRVQ | TPPRHIPGVV | EVTLSYKSKQ | FCKGAPGRFV | YT | ALNEPTI  | DYGFQRLQKV | IPRHGDDPER  |  |
| Dr              | COE3  | IKAISPSEGW | TTGGATVII  | GDNFFDGLQV | VFGTMLVWSE | LITPHAIRVQ | TPPRHIPGVV | EVTLSYKSKQ | FCKGAPGRFV | YT | ALNEPTI  | DYGFQRLQKV | IPRHGDDPER  |  |
| EBF4            |       |            |            |            |            |            |            |            |            |    |          |            |             |  |
| Mm              | EBF4  | IKAISPSEGW | TTGGATVII  | GDNFFDGLQV | VFGNVLWSE  | LITPHAIRVQ | TPPRHIPGVV | EVTLSYKSKQ | FCKGAPGRFV | YT | ALNEPTI  | DYGFQRLQKV | IPRHGDDPER  |  |
| Hs              | EBF4  | IKAISPSEGW | TTGGATVII  | GDNFFDGLQV | VFGNVLWSE  | LITPHAIRVQ | TPPRHIPGVV | EVTLSYKSKQ | FCKGAPGRFV | YT | ALNEPTI  | DYGFQRLQKV | IPRHGDDPER  |  |
| Md              | EBF4  | IKAISPSEGW | TTGGATVII  | GDNFFDGLQV | VFGTMLVWSE | LITPHAIRVQ | TPPRHIPGVV | EVTLSYKSKQ | FCKGAPGRFV | YT | ALNEPTI  | DYGFQRLQKV | IPRHGDDPER  |  |
| Unassigned      |       |            |            |            |            |            |            |            |            |    |          |            |             |  |
| Dr              | COE   | IKAISPSEGW | TSGGASVII  | GDQFFSGLQV | VFGTMLVWSE | VITPHAIRVQ | TPPRHIPGVV | EVTLSYKSKQ | FCRGAPGRFV | YT | ALNEPTI  | DYGFQRLQKV | IPHHGDDVER  |  |
| LAMPREYS        |       |            |            |            |            |            |            |            |            |    |          |            |             |  |
| Pm              | COE-A | IKAISPSEGW | TTGGATVII  | GDNFFDGLQV | VFGTMLVWSE | LITPHAIRVQ | TPPRHIPGVV | EVTLSYKSKQ | FCKGAPGRFV | YT | ALNEPTI  | DYGFQRLQKL | IPRHGDDPER  |  |
| NON-VERTEBRATES |       |            |            |            |            |            |            |            |            |    |          |            |             |  |
| Ci              | COE   | IKAINPAEGW | TTGGATVII  | GENFFDGLQV | VFGSMVWSE  | LITQHAIRVQ | TPPRHLPGVV | EVTLSYKSKQ | FCSGAPGRFV | YT | ALNEPTL  | DYGFQRLQKL | VPRHPGDDPER |  |
| Bf              | COE   | IKAISPSEGW | TTGGATVII  | GDNFFDGLQV | VFGTMLVWSE | LITPHAIRVQ | TPPRHIPGVV | EVTLSYKSKQ | FCKGAPGRFV | YT | SLNEPTI  | DYGFQRLQKL | VPRHPGDDPER |  |
| Lg              | COE   | IKAICPSEGW | TSGGATVII  | GDNFFDGLQV | VFGTMLVWSE | LITSHAIRVQ | TPPRHIPGVV | EVTLSYKSKQ | FCKGAPGRFV | YT | ALTEPTI  | DYGFQRLQKL | VPRHPGDDPER |  |
| Cc              | COE   | IKAICPSEGW | TTGGATVII  | GDNFFDGLQV | VFGTMLVWSE | LITSHAIRVQ | TPPRHIPGVV | EVTLSYKSKQ | FCKGAPGRFV | YT | ALTEPTI  | DYGFQRLQKL | VPRHPGDDPER |  |
| Dm              | COE   | IKAISPSEGW | TTGGATVII  | GDNFFDGLQV | VFGTMLVWSE | LITSHAIRVQ | TPPRHIPGVV | EVTLSYKSKQ | FCKGSPGRFV | YV | SALNEPTI | DYGFQRLQKL | IPRHGDDPER  |  |
| Nv              | COE   | IKAICPNEGW | TIGGSNVILI | GDNFFDGLQV | VFGSFIWSE  | FITPHALRVQ | APPSMPGVV  | KVYLMHKEKQ | YCKYAPAKFG | YT | ALVEPTI  | DYGFQRLSKL | IPRHGDDPER  |  |

## GNATHOSTOMES

## H2d

## H2a

| GNATHOSTOMES    |       | H2d        |             |             |            |            |            |            |            |            |            | H2a        |       |            |             |  |  |  |  |  |  |
|-----------------|-------|------------|-------------|-------------|------------|------------|------------|------------|------------|------------|------------|------------|-------|------------|-------------|--|--|--|--|--|--|
| COE1            |       |            |             |             |            |            |            |            |            |            |            |            |       |            |             |  |  |  |  |  |  |
| Mm              | COE1  | LPKEVILKRA | ADLVEALYGM  | PHNNQ--EII  | LKRAADIAEA | LYSVPRNHQ  | LPALA-NTSV | HA-----    | -----      | -----      | GMMG       | VNS        | ----- | F          | SSQLAVNVSE  |  |  |  |  |  |  |
| Hs              | COE1  | LPKEVILKRA | ADLVEALYGM  | PHNNQ--EII  | LKRAADIAEA | LYSVPRNHQ  | LPALA-NTSV | HA-----    | -----      | -----      | GMMG       | VNS        | ----- | F          | SSQLAVNVSE  |  |  |  |  |  |  |
| Md              | COE1  | LPKEVILKRA | ADLVEALYGM  | PHNNQ--EII  | LKRAADIAEA | LYSVPRNHQ  | LPALA-NTSV | HA-----    | -----      | -----      | GMMG       | VNS        | ----- | F          | SSQLAVNVSE  |  |  |  |  |  |  |
| Xt              | COE1  | LPKEVILKRA | ADLVEALYGM  | PHNNQ--EII  | LKRAADIAEA | LYSVPRNHSQ | LPALT-NSSV | HP-----    | -----      | -----      | GMMG       | VNS        | ----- | F          | SSQLAVNVSE  |  |  |  |  |  |  |
| Dr              | COE1  | LPKEVILKRA | ADLVEALYGM  | PHNNQ--EII  | LKRAADIAEA | LYNVPRGHQ  | LPGLT-NSSV | HS-----    | -----      | -----      | GMMG       | VNS        | ----- | F          | HSQLAVNVSD  |  |  |  |  |  |  |
| COE2            |       |            |             |             |            |            |            |            |            |            |            |            |       |            |             |  |  |  |  |  |  |
| Mm              | COE2  | LAKEMLLKRA | ADLVEALYGT  | PHNNQ--DII  | LKRAADIAEA | LYSVPRNPSQ | IPALS-SSPA | HS-----    | -----      | -----      | GMMG       | INS        | ----- | Y          | GSQGVISISE  |  |  |  |  |  |  |
| Hs              | COE2  | LAKEMLLKRA | ADLVEALYGT  | PHNNQ--DII  | LKRAADIAEA | LYSVPRNPSQ | IPALS-SSPA | HS-----    | -----      | -----      | GMMG       | INS        | ----- | Y          | GSQGVISISE  |  |  |  |  |  |  |
| Xt              | COE2  | LAKEMLLKRA | ADLVEALYGT  | PHNNQ--DII  | LKRAADIAEA | LYSVPRNHQ  | IPALS-SSPV | HS-----    | -----      | -----      | GMMG       | INS        | ----- | Y          | GGQLGVISISE |  |  |  |  |  |  |
| Dr              | COE2  | LAKEMLLKRA | ADVVEESLYGN | TTSNQ--DML  | LKRAADIAEA | LYSVPRPHSQ | LQAMP-SSPV | HG-----    | -----      | -----      | SVMG       | LSS        | ----- | Y          | PTQLGVISIGE |  |  |  |  |  |  |
| COE3            |       |            |             |             |            |            |            |            |            |            |            |            |       |            |             |  |  |  |  |  |  |
| Mm              | COE3  | LPKEVLLKRA | ADLVEALYGM  | PHNNQ--EII  | LKRAADIAEA | LYSVPRNHQ  | IPTLG-NTPA | HT-----    | -----      | -----      | GMMG       | VNS        | ----- | F          | SSQLAVNVSE  |  |  |  |  |  |  |
| Hs              | COE3  | LPKEVLLKRA | ADLVEALYGM  | PHNNQ--EII  | LKRAADIAEA | LYSVPRNHQ  | IPTLG-NNPA | HT-----    | -----      | -----      | GMMG       | VNS        | ----- | F          | SSQLAVNVSE  |  |  |  |  |  |  |
| Xt              | COE3  | LPKEVLLKRA | ADLVEALYGM  | PHNNQAKEII  | LKRAADIAEA | LYSVPRNHQ  | IPSLA-NTPS | HS-----    | -----      | -----      | GMMG       | VNS        | ----- | F          | SSQLAVNVSE  |  |  |  |  |  |  |
| Dr              | COE3  | LPKEVLLKRA | ADLVEALYGM  | PHNNQ--EII  | LKRAADIAEA | LYSVPRNHQ  | IPSLA-NTAS | HG-----    | -----      | -----      | GMMG       | VNS        | ----- | F          | SSQLAVNVSE  |  |  |  |  |  |  |
| EBF4            |       |            |             |             |            |            |            |            |            |            |            |            |       |            |             |  |  |  |  |  |  |
| Mm              | EBF4  | LPKEVLLKRA | ADLAEALYGV  | PSSNQ--ELL  | LKRAADVAEA | LYSAPRAPAP | LGPLA-PSHP | HP-----    | -----      | -----      | AVVG       | INA        | ----- | F          | SSPLAIAVGD  |  |  |  |  |  |  |
| Hs              | EBF4  | LPKEVLLKRA | ADLAEALYGV  | PGSNQ--ELL  | LKRAADVAEA | LYSTPRAPGP | LAPLA-PSHP | HP-----    | -----      | -----      | AVVG       | INA        | ----- | F          | SSPLAIAVGD  |  |  |  |  |  |  |
| Md              | EBF4  | LPKEVLLKRA | ADLVEALYGM  | PHSNQ--DLI  | LKRAADIAEA | LYSVPRTPSQ | LGSLA-PGHP | HT-----    | -----      | -----      | AMMG       | INS        | ----- | F          | GSQAVNIGD   |  |  |  |  |  |  |
| Unassigned      |       |            |             |             |            |            |            |            |            |            |            |            |       |            |             |  |  |  |  |  |  |
| Dr              | COE   | LPKEVLLKRA | ADLIETFYGA  | PQNNQ--EII  | LKRASDIAEA | LNSIPRNPS- | -----HTNP  | H-----     | -----      | -----      | GMMG       | VNS        | ----- | Y          | DGQLSLNTEV  |  |  |  |  |  |  |
| LAMPREYS        |       |            |             |             |            |            |            |            |            |            |            |            |       |            |             |  |  |  |  |  |  |
| Pm              | COE-A | LPK-----   | -----       | -----Q--EII | LKRAADIAEA | LYSVPRNHQ  | LPAIN-NSPP | GLP-----   | -----      | -----      | GMMG       | MNS        | ----- | F          | GGQLAISVSE  |  |  |  |  |  |  |
| NON-VERTEBRATES |       |            |             |             |            |            |            |            |            |            |            |            |       |            |             |  |  |  |  |  |  |
| Ci              | COE   | LPK-----   | -----       | -----EII    | LKRAADVMEA | VISRQYAPPS | QMPPSAGITP | PAPHLAAAPC | APPGSFVPS  | ASAA--     | MAVA       | MNGYAAAA   | -V    | SSQFGGTPDR |             |  |  |  |  |  |  |
| Bf              | COE   | LPK-----   | -----       | -----EII    | LKRAADLAEA | LYSMRPNPL  | PALTPRPSA  | VNNSVGAG-- | -----      | -----      | GMMG       | MNS        | ----- | F          | GNQLAVSVDP  |  |  |  |  |  |  |
| Lg              | COE   | LPK-----   | -----       | -----EII    | LKRAADLAEA | LYSMRPNHNP | LSLPAPRSPA | MNNTS----  | -----      | -----      | PMNG       | FNA        | ----- | Y          | PSQLAVSVGS  |  |  |  |  |  |  |
| Cc              | COE   | LPKGICEGHV | GPLSSQIFLS  | CPQ---EII   | LKRAADLAEA | LYSMRPNPNQ | LSLPAPRSPA | MN-----    | -----      | -----      | NTTG       | FNS        | ----- | Y          | TGQLAVSVQD  |  |  |  |  |  |  |
| Dm              | COE   | LQK-----   | -----       | -----EII    | LKRAADLVEA | LYSMRSPG-  | -----      | -----      | -----      | -----      | GSTG       | FNS        | ----- | Y          | AGQLAVSVQD  |  |  |  |  |  |  |
| Nv              | COE   | IPK-----   | -----       | -----EIV    | LKRAADLAET | LYQMPRTPTQ | VHPSQYASTG | LATPKSPALV | GGQHYVTLPL | DSMTNVFTQS | ITQDNQPIAY | SSHNDNASDQ |       |            |             |  |  |  |  |  |  |

## GNATHOSTOMES

| GNATHOSTOMES |                                  |
|--------------|----------------------------------|
| COE1         |                                  |
| Mm           | COE1                             |
|              | ASQATNQ--                        |
|              | -----                            |
|              | -----GFTN--NSS SV-----           |
|              | SPHG-YV-P- STTPQQTN--            |
|              | -----                            |
|              | YNS-VTTSMN GYGSA--MSN LG--GSPTFL |

|                 |       |            |             |            |                     |             |            |            |            |            |            |            |            |             |            |
|-----------------|-------|------------|-------------|------------|---------------------|-------------|------------|------------|------------|------------|------------|------------|------------|-------------|------------|
| Hs              | COE1  | ASQATNQ--- | ----        | ----       | ----                | GFTR-NSS SV | ----       | SPHG-YV-P  | STTPQQTN   | ----       | ----       | YNS-VTSMN  | GYGSA      | -MSN        | LG--GSPTFL |
| Md              | COE1  | ASQATNQ--- | ----        | ----       | ----                | GFTR-NSS SV | ----       | SPHG-YV-P  | STTPQQTN   | ----       | ----       | YNS-VTSMN  | GYGNAG     | -MSN        | LG--GSPTFL |
| Xt              | COE1  | PSQVNTQ--- | ----        | ----       | ----                | GFSR-NTS SV | ----       | SPHG-YA-P  | STTPQQTN   | ----       | ----       | YSS-VTSMN  | GYGNTA     | -MSN        | LA--GSPSFL |
| Dr              | COE1  | STQAANQ--- | ----        | ----       | ----                | GFSR-NTS SV | ----       | SPHG-YV-P  | STTPQQSS   | ----       | ----       | YST-VTSMN  | GYGNAG     | -MTT        | LG--GSPNFL |
| COE2            |       |            |             |            |                     |             |            |            |            |            |            |            |            |             |            |
| Mm              | COE2  | STQGNQ---  | ----        | ----       | ----                | GYIR-NTS SI | ----       | SPRG-YV-S  | SSTPQQSN   | ----       | ----       | YST-SSNSMN | GYSNVP     | -MAN        | LGVPGSPGFL |
| Hs              | COE2  | STQGNQ---  | ----        | ----       | ----                | GYIR-NTS SI | ----       | SPRG-YV-S  | SSTPQQSN   | ----       | ----       | YST-SSNSMN | GYSNVP     | -MAN        | LGVPGSPGFL |
| Xt              | COE2  | SQAN-NQ--- | ----        | ----       | ----                | GYIR-NTS SI | ----       | SPRG-YV-S  | SSTPQQSN   | ----       | ----       | YST-PSNSMN | GYSNVP     | -MSN        | LGVPGSPGFI |
| Dr              | COE2  | PGQTSQV--- | ----        | ----       | ----                | GYTR-NSS SL | ----       | SPRG-YE-S  | SSTPQQSA   | ----       | ----       | YGS-NGGM-- | SYGAVP     | -MSS        | LGVSGSPGFN |
| COE3            |       |            |             |            |                     |             |            |            |            |            |            |            |            |             |            |
| Mm              | COE3  | TSQANDQV-- | ----        | ----       | ----                | GYSR-NTS SV | ----       | SPRG-YV-P  | SSTPQQSN   | ----       | ----       | YNT-VTSMN  | GYGSA      | -MAN        | LGVPGSPGFL |
| Hs              | COE3  | TSQANDQV-- | ----        | ----       | ----                | GYSR-NTS SV | ----       | SPRG-YV-P  | SSTPQQSN   | ----       | ----       | YNT-VTSMN  | GYGSA      | -MAS        | LGVPGSPGFL |
| Xt              | COE3  | TSQANDQV-- | ----        | ----       | ----                | GYSR-NTS SV | ----       | SPRG-YV-P  | SSTPQQSN   | ----       | ----       | YNT-VNSMN  | GYGNAG     | -MPN        | LGVPGSPGFL |
| Dr              | COE3  | TSQVFLSTV- | ----        | ----       | ----                | GYSR-NTS SV | ----       | SPRG-YV-P  | SSTPQQSN   | ----       | ----       | YNT-VNSMN  | GYGNTG     | -MPN        | LGVPSPPGFL |
| EBF4            |       |            |             |            |                     |             |            |            |            |            |            |            |            |             |            |
| Mm              | EBF4  | TTP--EP--- | ----        | ----       | ----                | GYAR-SCG SA | ----       | SPR--FA-P  | SPGSQQSS   | ----       | ----       | YGSGLGAGLG | SYGAPG     | -VTG        | LGVPGSPSFL |
| Hs              | EBF4  | ATPGPEP--- | ----        | ----       | ----                | GYAR-SCS SA | ----       | SPRG-FA-P  | SPGSQQSG   | ----       | ----       | YGGGLGAGLG | GYGAPG     | -VAG        | LGVPGSPSFL |
| Md              | EBF4  | STQGL----  | ----        | ----       | ----                | GYSR-NTS SV | ----       | SPRG-YV-P  | SSTPQQSS   | ----       | ----       | YSS-ITSSIN | GYGATG     | -MAG        | LGVPSPPSFL |
| Unassigned      |       |            |             |            |                     |             |            |            |            |            |            |            |            |             |            |
| Dr              | COE   | SQODAERA-- | ----        | ----       | ----                | SFNR-S--    | ----       | SNTG-FI-E  | GSTSQQSE   | ----       | ----       | FNN-TNMCMN | G          | .....       | .....      |
| LAMPREYS        |       |            |             |            |                     |             |            |            |            |            |            |            |            |             |            |
| Pm              | COE-A | ASQAADQ--- | ----        | ----       | ----                | GYTR-NSS SV | ----       | SPHG-YV-P  | SSTPQQSH   | ----       | ----       | YSS-VSSSMN | GYGVS      | GGMG        | LG.....    |
| NON-VERTEBRATES |       |            |             |            |                     |             |            |            |            |            |            |            |            |             |            |
| Ci              | COE   | FD-TGSDS-- | ----        | ----       | ----                | GYSR--GN SV | ----       | SPRNGYS-P  | QTPHSLNSG  | SIGSMVGLTT | VGA-VPAPAP | YHCAP      | S-FNS      | YSSASVLKYN  |            |
| Bf              | COE   | NSSTNGNGQV | QGFVVFVFTYS | GLKEDCAEQT | NHGYSR-QSN SV       | ----        | SPRG-YG-A  | -STPHSTN-G | SISSYST--- | ----       | SASGLN     | GYGSSG     | -NLS       | NMPVPSPPGF  |            |
| Lg              | COE   | VA-DTASQW  | -EEGWCKLRT  | SR-----    | SYNRSQSS SV         | ----        | SPRG-YG-SN | GSTPHSNG-S | YT-----    | ----       | STPAMN     | GYHHGG     | -GAL       | GNMNVNAPHSP |            |
| Cc              | COE   | TA-N--GQW  | -EE-----    | ----       | GWSH-LTS SLLGYSSRMT | PPHG-YP-M   | CSGSLSTS-C | SAYSGSS--- | ----       | STYSRS     | GYIDGC     | -TSS       | IPIGTPHSP  |             |            |
| Dm              | COE   | GS-----GQW | TED-----    | ----       | DYQRAQSS SV         | SPRGGYCSS   | ASTPHSSG-G | SY-----    | ----       | -----      | --GATA     | -ASA       | AVAATANGYA |             |            |
| Nv              | COE   | TD-MNNNVVQ | SS-----     | ----       | NSSR-LTS NA         | TLSG-VI-N   | MSNHDSHNG  | VMASDEGLS  | AIATVNSCY  | GNGSPA     | -LSC       | MAVPASPGYF |            |             |            |

GNATHOSTOMES

|                 |       |            |            |            |             |             |            |            |            |            |            |         |       |       |       |
|-----------------|-------|------------|------------|------------|-------------|-------------|------------|------------|------------|------------|------------|---------|-------|-------|-------|
| COE1            |       |            |            |            |             |             |            |            |            |            |            |         |       |       |       |
| Mm              | COE1  | NGSAANSPLY | IVPSSPTMA- | -SSTSLPNC  | SSSSGIFSPS  | PANMVSAVKQ  | KSA--FAPVV | RPQTS-PPPT | CTST-NGNSL | QAISGMIVPP | M          |         |       |       |       |
| Hs              | COE1  | NGSAANSPLY | IVPSSPLMA- | -SSTSLPNC  | SSSSGIFSPS  | PANMVSAVKQ  | KSA--FAPVV | RPQTS-PPPT | CTST-NGNSL | QAISGMIVPP | M          |         |       |       |       |
| Md              | COE1  | NGSAANSPLY | IVPSSPTMA- | -SSTSLPNC  | SSSSGIFSPS  | PANMVSAVKQ  | KSA--FAPVV | RPQTS-PPPT | CTST-NGNSL | QAISGMIVPP | M          |         |       |       |       |
| Xt              | COE1  | NGSAANSPLY | IVPSSPTMA- | -SSTSLPNC  | SSSSGIFSPS  | PANMVSAVKQ  | KSA--FAPVV | RPQAS-PPPT | CSSS-SATS  | QAISGMIA   | PP M       |         |       |       |       |
| Dr              | COE1  | NGSAANSPLY | IVPSSPTMA- | -SSTSLPNC  | SSSSGIFSPS  | PANMVSAVKQ  | KSA--FAPVV | RPQAS-PPPT | CTSA-NGNGL | QGESG----  | -          |         |       |       |       |
| COE2            |       |            |            |            |             |             |            |            |            |            |            |         |       |       |       |
| Mm              | COE2  | NGSPTGSPYG | IMSSSPTV-- | -----GS    | SSTSILPFS   | SSVFP-AVKQ  | KSA--FAPVI | RPQGS-PSPA | CSSG-NGNGF | RAMTGLVVPP | M          |         |       |       |       |
| Hs              | COE2  | NGSPTGSPYG | IMSSSPTV-- | -----GS    | SSTSILPFS   | SSVFP-AVKQ  | KSA--FAPVI | RPQGS-PSPA | CSSG-NGNGF | RAMTGLVVPP | M          |         |       |       |       |
| Xt              | COE2  | NGSPTTSPYG | IMPSSPPV-- | -----GS    | SGSSILPFS   | SSVFP-SIKQ  | KSA--FAPVI | RPQGS-PSPA | CSSS-NSNGF | RAMTGLVVPP | M          |         |       |       |       |
| Dr              | COE2  | SASPNSPYA  | IMPSSPP--  | -----GS    | SSSSSLLPFS  | S--FPSSTKQ  | KSA--FAPVL | RPQGF-PHP  | SAKTSGGTSF | RAMTGLVVPP | M          |         |       |       |       |
| COE3            |       |            |            |            |             |             |            |            |            |            |            |         |       |       |       |
| Mm              | COE3  | NGSSANSPLY | -----      | -----      | -----       | -----MKQ    | KSA--FAPVV | RPQAS-PPPS | CTSA-NGNGL | QAMSGLVVPP | M          |         |       |       |       |
| Hs              | COE3  | NGSSANSPLY | IVPSSPTMAA | -SSVTLPSNC | SSTHGIFSPS  | PANVISAVKQ  | KSA--FAPVV | RPQAS-PPPS | CTSA-NGNGL | QAMSGLVVPP | M          |         |       |       |       |
| Xt              | COE3  | NGSSANSPLY | IVPSSPTMAA | -SSVTLPSNC | SSTHGIFSPS  | PANVISAVKQ  | KSA--FAPVV | RPQAS-PPPS | CTSA-NGNGL | QDMYFNPTFP | KS         |         |       |       |       |
| Dr              | COE3  | NGSSANSPLY | IVPSSPTMAA | -SSVSLSSNC | SSTHGIFSPS  | PANVISAVKQ  | KSA--FAPVV | RPQAS-PPPS | CTSA-NGNGL | QAMSGLVVPP | M          |         |       |       |       |
| EBF4            |       |            |            |            |             |             |            |            |            |            |            |         |       |       |       |
| Mm              | EBF4  | NGSTATSPFA | IMPSSPLAA  | ASSMSLPAAA | PTTS-VFSFS  | PVNMICAVKQ  | RSA--FAPVL | RPPSS-PSQA | CPRA-HREGL | PAQRTGR    |            |         |       |       |       |
| Hs              | EBF4  | NGSTATSPFA | IMPSSPLAA  | ASSMSLPAAA | PTTS-VFSFS  | PVNMIASAVKQ | RSA--FAPVL | RPPSS-PPQA | CPRA-HGEGL | PDQSFEDSDK | FHSPARGLQ  | LAYS    |       |       |       |
| Md              | EBF4  | NGSTANSPLY | IMPSSPPL-A | ASSISLPAAA | PTTS-VFSFS  | PVNMIASAVKQ | KSA--FAPPA | SLLCP-PLVP | SVPL.LLDTD | PA..FEDSDK | FHSPARGLQ  | LAYS    |       |       |       |
| Unassigned      |       |            |            |            |             |             |            |            |            |            |            |         |       |       |       |
| Dr              | COE   | .....      | .....      | .....      | .....       | .....       | .....      | .....      | .....      | .....      | .....      | .....   | ..... | ..... | ..... |
| LAMPREYS        |       |            |            |            |             |             |            |            |            |            |            |         |       |       |       |
| Pm              | COE.A | .....      | .....      | .....      | .....       | .....       | .....      | .....      | .....      | .....      | .....      | .....   | ..... | ..... | ..... |
| NON-VERTEBRATES |       |            |            |            |             |             |            |            |            |            |            |         |       |       |       |
| Ci              | COE   | LFTVIPSPH  | NGMNLPPSSG | TTT-----   | -----GIFSPS | PANMISAARK  | KSA--FAPVH | RPHNS-PSPL | APSNGNIGKI | SCFVLSSI   |            |         |       |       |       |
| Bf              | COE   | LNGSTIPSSP | TMPPTPSSLA | TNASTP---- | -----GIFFS  | PANMISAARK  | KSA--FAPVV | RPQ--SSPS  | PAGASSNGTG | LQGGWPTIP  | SAVC       |         |       |       |       |
| Lg              | COE   | PMHNIGSQGL | GSCPT----- | -----      | -----GIFSPS | PANMITAVKQ  | RSA--FAPVL | RGNS-PPPT  | FPGIQTSGWA | HPLIHVSIIS | TSLPSNALKV | SY      |       |       |       |
| Cc              | COE   | PSQSPSLPPT | ASCVAP---  | -----      | -----GLHSFS | HANVLSAVKQ  | RSA--FAPVL | RPSSSPVP   | MTSIAAAGWA | HTLPTSGMTD | CHSIHA     |         |       |       |       |
| Dm              | COE   | PAPNM----- | -----      | -----      | -----GTLSSS | PGSVFNSTR   | VSSLSFNPFA | LP---      | -----      | -----      | --TCNTQGY  | TQLVTSK |       |       |       |
| Nv              | COE   | TGAFIPQSPS | LPPTNSVPP  | SSNN-----  | -----SIFSP  | P-NMIQAVKQ  | KSA--FNAVS | RGPESTAHPR | SPAVQGVMT  | STYNGPFAV  | VSSVNAYIKS | IQPQVKP |       |       |       |

**Figure S1 : Alignment used in the phylogenetic analysis of metazoan COE proteins**

Dashes indicate missing residues; dots at the C-terminal end of DrCOE and PmCOE-A stand for undetermined residues. Only the positions shaded in yellow were used in the phylogenetic analysis. Highly truncated (XtCOE1, PmCOE-B ) or divergent (Ce COE) predicted sequences were excluded from the analysis. The 8 to 10 residues inclusion between the DBD and IPT domains in vertebrate COE proteins, due to the existence of an alternative splice donor site is underlined in MmCOE1. Same abbreviations as in Figure 1. DBD, DNA Binding Domain ; IPT, Ig-like/Plexin/transcription Factor Domain ; H1/2d/2a, Helix H1/2d/2a.
