# Supplementary material for: The metazoan history of the COE transcription factors. Selection of a variant HLH motif by mandatory inclusion of a duplicated exon in vertebrates
Source: PubMed Central journal article supplement (PMC2394523; doi:10.1186/1471-2148-8-131), 2008-05-02
Supplement: 1471-2148-8-131-S2.pdf [file 1471-2148-8-131-S2.pdf]

## DNA BINDING DOMAIN

### GNATHOSTOMES

#### COE1

|                      |      |            |            |            |            |            |            |            |            |            |            |
|----------------------|------|------------|------------|------------|------------|------------|------------|------------|------------|------------|------------|
| <i>M. musculus</i>   | COE1 | RAHFQKPPS  | NLRKSNFFHF | VLALYDRQGG | PVEIERTAFV | GFVEKEK--- | -EANSEKTNN | GIHYRLQLLY | SNGIRTEQDF | YVRLIDSMTK | QAIYVEGQDK |
| <i>H. sapiens</i>    | COE1 | RAHFQKPPS  | NLRKSNFFHF | VLALYDRQGG | PVEIERTAFV | GFVEKEK--- | -EANSEKTNN | GIHYRLQLLY | SNGIRTEQDF | YVRLIDSMTK | QAIYVEGQDK |
| <i>M. domestica</i>  | COE1 | RAHFQKPPS  | NLRKSNFFHF | VLALYDRQGG | PVEIERTAFV | GFVEKEK--- | -EANSEKTNN | GIHYRLQLLY | SNGIRTEQDF | YVRLIDSMTK | QAIYVEGQDK |
| <i>O. anatinus</i>   | COE1 | RAHFQKPPS  | NLRKSNFFHF | VLALYDRQGG | PVEIERTAFV | GFVEKEK--- | -EANSEKTNN | GIHYRLQLLY | SNGXXXXXXX | XXXXXXXXXX | XXXXXXXXXX |
| <i>G. gallus</i>     | COE1 | RAHFQKPPS  | NLRKSNFFHF | VLALYDRQGG | PVEIERTAFV | GFVEKEK--- | -EANSEKTNN | GIHYRLQLLY | SNGIRTEQDF | YVRLIDSMTK | QAIYVEGQDK |
| <i>X. tropicalis</i> | COE1 | XXXXXXXXXX | XXXXXXXXXX | XXXXXXXXXX | XXXXXXXXXX | XXXXXXXXXX | XXXXXXXXXX | XXXXXXXXXX | XXXXXXXXXX | XXXXXXXXXX | XXXXXXXXXX |
| <i>D. rerio</i>      | COE1 | RAHFQKPPS  | NLRKSNFFHF | VLALYDRQGG | PVEIERTSFV | GFVEKEK--- | -ARIGKTTNN | GIHYRLQLLY | SNGIRTEQDF | YVRLIDSMTK | QAIYVEGQDK |

#### COE2

|                      |      |            |            |            |            |            |             |            |            |            |            |
|----------------------|------|------------|------------|------------|------------|------------|-------------|------------|------------|------------|------------|
| <i>M. musculus</i>   | COE2 | RAHFQKPPS  | NLRKSNFFHF | VLALYDRQGG | PVEIERTAFV | DFVENDK--- | -EQGNEKTNN  | GTHYKLQLLY | SNGVRTEQDL | YVRLIDSVTK | QPIAYEGQNK |
| <i>H. sapiens</i>    | COE2 | RAHFQKPPS  | NLRKSNFFHF | VLALYDRQGG | PVEIERTAFV | DFVENDK--- | -EQGNEKTNN  | GTHYKLQLLY | SNGVRTEQDL | YVRLIDSVTK | QPIAYEGQNK |
| <i>O. anatinus</i>   | COE2 | XXXXXXXXXX | XXXXXXXXXX | XXXXXXXXXX | XXXXXXXXXX | XXXXXXXXXX | XXXXXXXXXX  | XXXXXXXXXX | XXXXXXXXXX | XXXXXXXXXX | XXXXXXXXXX |
| <i>G. gallus</i>     | COE2 | RAHFQKPPS  | NLRKSNFFHF | VLALYDRQGG | PVEIERTAFV | DFVENDK--- | -EQGNEKTNN  | GTHYKLQLLY | SNGVRTEQDL | YVRLIDSVTK | QPITYEGQNK |
| <i>X. tropicalis</i> | COE2 | RAHFQKPPS  | NLRKSNFFHF | VLALYDRQGG | PIEIERTAFV | DFVENEK--- | -ELSTKTTNN  | GTHYKLQLLY | SNGVRTEQDL | YVRLIDSVTK | QPIAYEGQNK |
| <i>D. rerio</i>      | COE2 | RAHFQKPPS  | NLRKSNFFHF | VLALYDRNGQ | PVEVERTSFV | DFVEQDK--- | ---TGEKTTNN | GTHYKLQLLY | SNGVRTEQDL | YARLIDSVTK | QPISYEGQNK |

#### COE3

|                      |      |            |            |            |            |            |            |            |            |            |            |
|----------------------|------|------------|------------|------------|------------|------------|------------|------------|------------|------------|------------|
| <i>M. musculus</i>   | COE3 | RAHFQKPPS  | NLRKSNFFHF | VLALYDRQGG | PVEIERTAFV | DFVEKEK--- | -EPNNEKTNN | GIHYKLQLLY | SNGVRTEQDL | YVRLIDSMTK | QAIYVEGQDK |
| <i>H. sapiens</i>    | COE3 | RAHFQKPPS  | NLRKSNFFHF | VLALYDRQGG | PVEIERTAFV | DFVEKEK--- | -EPNNEKTNN | GIHYKLQLLY | SNGVRTEQDL | YVRLIDSMTK | QAIYVEGQDK |
| <i>O. anatinus</i>   | COE3 | RAHFQKPPS  | NLRKSNFFHF | VLALYDRQGG | PVEIERTAFV | DFVEKEK--- | -EPNNEKTNN | GIHYKLQLLY | SNGVRTEQDL | YVRLIDSMTK | QAIYVEGQDK |
| <i>G. gallus</i>     | COE3 | XXXXXXXXXX | XXXXXXXXXX | XXXXXXXXXX | XXXXXXXXXX | XXXXXXXXXX | XXXXXXXXXX | XXXXXXXXXX | XXXXXXXXXX | XXXXXXXXXX | XXXXXXXXXX |
| <i>X. tropicalis</i> | COE3 | RAHFQKPPS  | NLRKSNFFHF | VLALYDRQGG | PVEIERTAFV | DFVEKDK--- | -EPNSEKTNN | GIHYKLQLLY | SNGVRTEQDL | YVRLIDSMTK | QAIYVEGQDK |
| <i>D. rerio</i>      | COE3 | RAHYEQPPS  | NLRKSNFFHF | VLALYDRQGG | PVEIERTAFV | DFVEKEK--- | -EPNSEKTNN | GIHYKLQLLY | SNGVRTEQDL | YVRLIDSMTK | QAIYVEGQDK |

#### EBF4

|                     |      |           |            |            |            |            |            |            |            |            |            |
|---------------------|------|-----------|------------|------------|------------|------------|------------|------------|------------|------------|------------|
| <i>M. musculus</i>  | EBF4 | RAHFQKPPS | NLRKSNFFHF | VLAMYDRQGG | PVEVERTAFI | DFVEKDR--- | -EPGTEKTNN | GIHYRLRLVY | NNGLRTEQDL | YVRLIDSMK  | QAIYVEGQDK |
| <i>H. sapiens</i>   | EBF4 | RAHFQKPPS | NLRKSNFFHF | VLAMYDRQGG | PVEVERTAFI | DFVEKDR--- | -EPGAETKNN | GIHYRLRLVY | NNGLRTEQDL | YVRLIDSMK  | QAIYVEGQDK |
| <i>M. domestica</i> | EBF4 | RAHFQKPPS | NLRKSNFFHF | VLAMYDRQGG | PVEIERTAFI | DFVEKER--- | -EPSGERTNN | GIHYRLQLLY | SNGIRTEQDL | YVRLIDSMK  | QAIYVEGQDK |
| <i>O. anatinus</i>  | EBF4 | RAHFQKPPA | NLRKSNFFHF | VLAMYDRHGQ | PVEVERSAFV | GFVEKGR--- | -EHGGKTTNN | GIHYRLQLLY | SNGIRTEQDL | YVRLIDSVSK | QAIYVEGQDK |
| UNASSIGNED          |      |           |            |            |            |            |            |            |            |            |            |
| <i>D. rerio</i>     | COE  | RAHFQKPPA | NLRKSNFFHF | VLALYDSQGG | SVEIEQTTFV | DFVEKDK--- | -EPVSEKTNN | GIHYKLQLLY | NNGVRTEQDL | YIRLIDSVTK | QAIYVEGQDK |

### LAMPREYS

|                   |       |            |            |            |            |            |            |            |            |            |            |
|-------------------|-------|------------|------------|------------|------------|------------|------------|------------|------------|------------|------------|
| <i>P. marinus</i> | COE-A | RAHFQKPPS  | NLRKSNFFHF | VLALYDRQGG | PVEIERTAFV | DFVEKDR--- | -EPNSEKTNN | GIHYRLQLLY | SNGVRTEQDL | YVRLIDSMNK | XXXXXXXXXX |
| <i>P. marinus</i> | COE-B | XXXXXXXXXX | XXXXXXXXXX | XXXXXXXXXX | XXXXXXXXXX | XXXXXXXXXX | XXXXXXXXXX | XXXXXXXXXX | XXXXXXXXXX | XXXXXXXXXX | XXXXXXXXXX |

### NON-VERTEBRATES

|                         |     |           |            |            |            |            |             |            |            |            |            |
|-------------------------|-----|-----------|------------|------------|------------|------------|-------------|------------|------------|------------|------------|
| <i>C. intestinalis</i>  | COE | RAHFQKPPN | NLRKSNFFHF | VLALYDRQGG | PVEIERSAFV | GFVENET--- | -EIAGEKTNN  | GIQYRLQLLY | HSGVRTEQDV | FVRLIDSATK | QSITYEGQDK |
| <i>B. floridae</i>      | COE | RAHFQKPPS | NLRKSNFFHF | VIALYDRQGG | PVEIERTAFI | DFVEKDRISP | QETAGENTRN  | GIHYRLQLLY | SNGVRTEQDL | YVRLIDSMTK | QAIYVEGQDK |
| <i>S. purpuratus</i>    | COE | RAHFQKPPS | NLRKSNFFHF | VIALYDRAGQ | PIEVERTSFV | DFIEKER--- | -EPDATKTTNN | GIHYRIQMLF | HNGVRTEQDL | YVRLIDSMTK | QAIYVEGQDK |
| <i>L. gigantea</i>      | COE | RAHFQKPPS | NLRKSNFFHF | VLALYDRQGG | PVEIERTAFI | DFVEKDQ--- | -EHESQKTNN  | GIHYRLQLLF | ANGVRQEQEI | YVRLIDSVSK | QAIYVEGQDK |
| <i>C. capitata</i>      | COE | RAHYEQPPS | NLRKSNFFHF | VLALYDRQGG | PVEIERTAFI | DFVEKER--- | -EPEG-KTTNN | GIHYRLQLLY | ANGVRQEQDL | YVRLIDSVTK | QAIYVEGQDK |
| <i>D. melanogaster</i>  | COE | RAHFQKPPS | NLRKSNFFHF | VIALYDRAGQ | PIEVERTAFI | GFIEKDS--- | -ESDATKTTNN | GIQYRLQLLY | ANGARQEQDI | FVRLIDSVTK | QAIYVEGQDK |
| <i>C. elegans</i>       | COE | RAHFQKPPN | NLRKSNFFHF | VIALYDRNSQ | PIEVERTQFA | GFVEKEK--- | -EVDGQDTRN  | GIHYRLSLMF | QNGIRSEHDL | FVRLIDSSTK | QAITVEGQDK |
| <i>N. vectensis</i>     | COE | RCHFQKPPA | NLRKSNFFHF | VLAFFDHNGQ | AVEIERASFI | DFIEH----  | -LPEDKNVRN  | GVLYRVLLLY | SNGIRTEQDI | FVRLIDAATK | QIVPYEGQDK |
| <i>A. queenslandica</i> | COE | AAQFQKPPD | NMRKSNFFHF | IISLFDGQQH | RIQVQKAVFK | DFYDTV---- | -GTDEQEYRN  | GLIYKLLVYV | SDGTQKEEEL | CVRLIDSNTK | QLVPYEGTNK |

## DNA BINDING DOMAIN

### GNATHOSTOMES

|            |            |            |            |            |             |            |             |            |            |            |            |
|------------|------------|------------|------------|------------|-------------|------------|-------------|------------|------------|------------|------------|
| COE1       |            |            |            |            |             |            |             |            |            |            |            |
| MmCOE1     | NPENCRVLLT | ---HEIMCSR | CCDKKSCGNR | NETPSDPVII | D--RFFLKFF  | LKCNQNCLKN | AGNPRDMRR-  | FQVVVSTTVN | VDGHVLAVSD | NMFVHNNSKH | GRRARRL-DP |
| HsCOE1     | NPENCRVLLT | ---HEIMCSR | CCDKKSCGNR | NETPSDPVII | D--RFFLKFF  | LKCNQNCLKN | AGNPRDMRR-  | FQVVVSTTVN | VDGHVLAVSD | NMFVHNNSKH | GRRARRL-DP |
| MdCOE1     | NPENCRVLLT | ---HEIMCSR | CCDKKSCGNR | NETPSDPVII | D--RFFLKFF  | LKCNQNCLKN | AGNPRDMRR-  | FQVVVSTTVN | VDGHVLAVSD | NMFVHNNSKH | GRRARRL-DP |
| OaCOE1     | XXXXXXXXXX | XXXXXXXXXX | XXXXXXXXXX | XXXXXXXXXX | XXXXXXXXXX  | XXXXXXXXXX | XXXXXXXXXX  | XXXXXXXXXX | XXXXXXXXXX | XXXXXXXXXX | XXXXXXXXXX |
| GgCOE1     | NPENCRVLLT | ---HEIMCSR | CCDKKSCGNR | NETPSDPVII | D--RFFLKFF  | LKCNQNCLKN | AGNPRDMRR-  | FQVVVSTTVN | VDGHVLAVSD | NMFVHNNSKH | GRRARRL-DP |
| XtCOE1     | XXXXXXXXXX | XXXXXXXXXX | XXXXXXXXXX | XXXXXXXXXX | XXXXRFFLKFF | LKCNQNCLKN | AGNPRDMRR-  | FQVVVSTTVN | VDGHVLAVSD | NMFVHNNSKH | GRRARRL-DP |
| DrCOE1     | NPEMLTALFL | SSSPSVSISR | CCDKKSCGNR | NETPSDPVII | D--RFFLKFF  | LKCNQNCLKN | AGNPRDMRR-  | FQVVVSTTVS | VDGHVLAVSD | NMFVHNNSKH | GRRARRL-DP |
| COE2       |            |            |            |            |             |            |             |            |            |            |            |
| MmCOE2     | NPENCRVLLT | ---HEVMCSR | CCEKKSCGNR | NETPSDPVII | D--RFFLKFF  | LKCNQNCLKT | AGNPRDMRR-  | FQVVLSTTVN | VDGHVLAVSD | NMFVHNNSKH | GRRARRL-DP |
| HsCOE2     | NPENCRVLLT | ---HEVMCSR | CCEKKSCGNR | NETPSDPVII | D--RFFLKFF  | LKCNQNCLKT | AGNPRDMRR-  | FQVVLSTTVN | VDGHVLAVSD | NMFVHNNSKH | GRRARRL-DP |
| OaCOE2     | XXXXXXXXXX | XXXXXXXXXX | XXXXXXXXXX | XXXXXXXXXX | XXXXXXXXXX  | XXXXXXXXXX | XXXXXXXXXK- | VQVTGASKVN | VDGHVLAVSD | NMFVHNNSKH | GRRARRL-DP |
| GgCOE2     | NPENCRVLLT | ---HEVMCSR | CCEKKSCGNR | NETPSDPVII | DSYRFFLKFF  | LKCNQNCLKT | AGNPRDMRR-  | FQVVLSTTVN | VDGHVLAVSD | NMFVHNNSKH | GRRARRL-DP |
| XtCOE2     | NPENCRVLLT | ---HEVMCSR | CCEKKSCGNR | NETPSDPVII | D--RFFLKFF  | LKCNQNCLKT | AGNPRDMRR-  | FQVVLSTTVN | VDGHVLAVSD | NMFVHNNSKH | GRRARRL-DP |
| DrCOE2     | NPENCRVLLT | ---HEVMCSR | CCEKKSCGNR | NETPSDPVII | D--RFFLKFF  | LKCNQNCLKT | AGNPRDMRR-  | FQVVLSTTVS | VDGPVLAISD | NMFVHNNSKH | GRRSRRL-DP |
| COE3       |            |            |            |            |             |            |             |            |            |            |            |
| MmCOE3     | NPENCRVLLT | ---HEIMCSR | CCDKKSCGNR | NETPSDPVII | D--RFFLKFF  | LKCNQNCLKN | AGNPRDMRR-  | FQVVVSTTVN | VDGHVLAVSD | NMFVHNNSKH | GRRARRL-DP |
| HsCOE3     | NPENCRVLLT | ---HEIMCSR | CCDKKSCGNR | NETPSDPVII | D--RFFLKFF  | LKCNQNCLKN | AGNPRDMRR-  | FQVVVSTTVN | VDGHVLAVSD | NMFVHNNSKH | GRRARRL-DP |
| OaCOE3     | NPENCRVLLT | ---HEIMCSR | CCDKKSCGNR | NETPSDPVII | D--RFFLKFF  | LKCNQNCLKN | AGNPRDMRR-  | FQVVVSTTVN | VDGHVLAVSD | NMFVHNNSKH | GRRARRL-DP |
| GgCOE3     | XXXXXXXXXX | XXXXXXXXXX | CCDKKSCGNR | NETPSDPVII | D--RFFLKFF  | LKCNQNCLKN | AGNPRDMRR-  | FQVVVSTTVN | VDGHVLAVSD | NMFVHNNSKH | GRRARRL-DP |
| XtCOE3     | NPENCRVLLT | ---HEIMCSR | CCDKKSCGNR | NETPSDPVII | D--RFFLKFF  | LKCNQNCLKN | AGNPRDMRR-  | FQVVVSTTVN | VDGHVLAVSD | NMFVHNNSKH | GRRARRL-DP |
| DrCOE3     | NPENCRVLLT | ---HEIMCSR | CCDKKSCGNR | NETPSDPVII | D--RFFLKFF  | LKCNQNCLKN | AGNPRDMRR-  | FQVVVSTTVN | VDGHVLAVSD | NMFVHNNSKH | GRRARRL-DP |
| EBF4       |            |            |            |            |             |            |             |            |            |            |            |
| MmEBF4     | NPENCRVLLT | ---HEIMCSR | CCDRKSCGNR | NETPSDPVII | D--RFFLKFF  | LKCNQNCLKN | AGNPRDMRR-  | FQVVVSTTVS | VDGHVLAVSD | NMFVHNNSKH | GRRARRL-DP |
| HsEBF4     | NPENCRVLLT | ---HEIMCSR | CCDRKSCGNR | NETPSDPVII | D--RFFLKFF  | LKCNQNCLKN | AGNPRDMRR-  | FQVVVSTTVS | VDGHVLAVSD | NMFVHNNSKH | GRRARRL-DP |
| MdEBF4     | NPENCRVLLT | ---HEIMCSR | CCDKKSCGNR | NETPSDPVII | D--RFFLKFF  | LKCNQNCLKN | AGNPRDMRR-  | FQVVVSTTVS | VDGHVLAVSD | NMFVHNNSKH | GRRARRL-DP |
| OaEBF4     | NPENCRVLLT | ---HEIMCSR | CCDKKSCGNR | NETPSDPVII | D--RFFLKFF  | LKCNQNCLKN | AGNPRDMRR-  | FQXXXXXXXX | XXXXXXXXXX | XXXXXXXXXX | XXXXXXXXXX |
| UNASSIGNED |            |            |            |            |             |            |             |            |            |            |            |
| DrCOE      | NPENCRVLLT | ---HETMCSR | CCDKKSCGNR | NETPSDPVII | D--RFFLKFF  | LKCNQNCLKN | AGNPRDTRR-  | FQVLVSTTAS | VKAHILAISS | NIFVHNNSKH | GRRARRF-EL |

### LAMPREYS

|          |            |            |            |            |            |            |            |            |            |            |            |
|----------|------------|------------|------------|------------|------------|------------|------------|------------|------------|------------|------------|
| Pm COE-A | XXXXXXXXXX | XXXXXXXXXS | CCDKKNCGR  | NETPSDPVII | D--RFFLKFF | LKCNQNCLKN | AGNPRDMRR- | FQVVVSTTVH | VDGHVLAVSD | NMFVHNNSKH | GRRARRI-DP |
| Pm COE-B | XXXXXXXXXX | XXXXXXXXXX | XXXXXXXXXX | XXXXXXXXXX | XXXXXXXXXX | XXXXXXXXXX | XXXXXXXXXX | XXXXXXXXXX | XXXXXXXXXX | XXXXXXXXXX | XXXXXXXXXX |

### NON-VERTEBRATES

|       |            |            |            |            |             |            |            |             |            |            |             |
|-------|------------|------------|------------|------------|-------------|------------|------------|-------------|------------|------------|-------------|
| CiCOE | NPENRRVLLT | ---HEIMCSR | CCDKKSCGNR | NETPSDPVII | D--RYFLKFF  | LKCNQNCLKN | AGNPRDMRR- | FQVVVSTTVH  | VDGHVLAVSD | NMFVHNNSKH | GRRARRV-DP  |
| BfCOE | NPENQRVLLT | ---HEIMCSR | CCDKKSCGNR | NETPSDPVII | D--RFFLKAF  | LKCNQNCLKN | AGNPRDMRR- | FQVVIATTVN  | VDGHVLAVSD | NMFVHNNSKH | GRRARRL-DP  |
| SpCOE | NPENCRVLLT | ---HEIMCSR | CCDKKSCGNR | NETPSDPVII | D--RFFLKFF  | LKCNQNCLKN | AGNPRDMRR- | FQVVIISTPN  | VDGHVLAVSD | NMFVHNNSKH | GRRARRL-DP  |
| LgCOE | NPENCRVLLT | ---HEVMCSR | CCDKKSCGNR | NETPSDPVII | D--RFFLKFF  | MKCNQNCLKN | AGNPRDMRR- | FQVAVSTVA   | IDGPLLTISD | NMFVHNNSKH | GRRARRL-DP  |
| CcCOE | NPENCRVLLT | ---HEIMCSR | CCDKKSCGNR | NETPSDPVII | D--RFFLKFF  | MKCNQNCLKN | AGNPRDMRR- | FQVSIGTSSS  | VEGPLLAVSD | NMFVHNNSKH | GRRARRL-DP  |
| DmCOE | NPENCRVLLT | ---HEVMCSR | CCDKKSCGNR | NETPSDPVII | D--RFFLKFF  | LKCNQNCLKN | AGNPRDMRR- | FQVVIISTQVA | VDGPLLAISS | NMFVHNNSKH | GRRARRL-DT  |
| CeCOE | NPENCRVLLT | ---HEVMCSR | CCEKKSCGNR | NETPSDPVII | D--RFFLKFF  | LKCNQNCLKN | AGNPRDMRR- | FQVVLCSAR   | IDGPLLAVSD | NMFVHNNSKH | GRRTRKRT-DA |
| NvCOE | NPENRRVLLT | ---HEVMCSR | CCEKKSCGNR | NETPSDPVII | D--RYCLKFF  | MKCNQNCLKN | AGNPKDMRR- | FQVHVSTVSD  | PMYGMIASS  | NMFVHNNSKH | GRRTRSRADG  |
| AmCOE | NPDFRRVLLT | ---HELICSR | CLERRSCGNK | NDTPSDPIIL | D--NFRCLKIF | AKCNQNCLKN | AGNPKDSRRR | FQVALYEIDK  | VSGQPIASS  | SMFVHNNSKH | GRRPIYR-DN  |

## Ig-like/Plexin/Transcription Factor Domain

### GNATHOSTOMES

|            |            |            |            |            |            |            |            |             |            |            |            |
|------------|------------|------------|------------|------------|------------|------------|------------|-------------|------------|------------|------------|
| COE1       |            |            |            |            |            |            |            |             |            |            |            |
| MmCOE1     | SEGT-PSYLE | H-----     | -----      | -ATPCIKAIS | PSEGWTGGA  | TVIIIGDNFF | DGLQVIFGTM | L-VWSE---L  | ITPHAIRVQT | PPRHIPGVVE | VTLSYKSK-- |
| HsCOE1     | SEGT-PSYLE | H-----     | -----      | -ATPCIKAIS | PSEGWTGGA  | TVIIIGDNFF | DGLQVIFGTM | L-VWSE---L  | ITPHAIRVQT | PPRHIPGVVE | VTLSYKSK-- |
| MdCOE1     | SEGT-PSYLE | H-----     | -----      | -ATPCIKAIS | PSEGWTGGA  | TVIIIGDNFF | DGLQVIFGTM | L-VWSE---L  | ITPHAIRVQT | PPRHIPGVVE | VTLSYKSK-- |
| OaCOE1     | XXXXXXXXXX | XXXXXXXXXX | XXXXXXXXXX | XXXXXXXXXX | XXXXXXXXXX | XXXXXXXXXX | XXXXXXXXXX | XXXXXXXXXXL | ITPHAIRVQT | PPRHIPGVVE | VTLSYKSK-- |
| GgCOE1     | SEGT-PSYLE | H-----     | -----      | -ATPCIKAIS | PSEGWTGGA  | TVIIIGDNFF | DGLQVIFGTM | L-VWSE---L  | ITPHAIRVQT | PPRHIPGVVE | VTLSYKSK-- |
| XtCOE1     | SDGT-PSYLE | HEA-----   | -----      | -ATPCIKAIS | PSEGWTGGA  | TVIVIGDNFF | DGLQVIFGTM | L-VWSE---L  | ITPHAIRVQT | PPRHIPGVVE | VTLSYKSK-- |
| DrCOE1     | SEGT-PSYLE | H-----     | -----      | -ATPCIKAIS | PSEGWTGGA  | TVIIIGDNFF | DGLQVIFGTM | L-VWSE---L  | ITPHAIRVQT | PPRHIPGVVE | VTLSYKSK-- |
| COE2       |            |            |            |            |            |            |            |             |            |            |            |
| MmCOE2     | SE-----    | -----      | -----      | -ATPCIKAIS | PSEGWTGGA  | MVIIIGDNFF | DGLQVVFSTM | L-VWSE---L  | ITPHAIRVQT | PPRHIPGVVE | VTLSYKSK-- |
| HsCOE2     | SE-----    | -----      | -----      | -ATPCIKAIS | PSEGWTGGA  | MVIIIGDNFF | DGLQVVFSTM | L-VWSE---L  | ITPHAIRVQT | PPRHIPGVVE | VTLSYKSK-- |
| OaCOE2     | SE-----    | -----      | -----      | -ATPCIKAIS | PSEGWTGGA  | MVIIIGDNFF | DGLQVVFSTM | L-VWSE---L  | ITPHAIRVQT | PPRHIPGVVE | VTLSYKSK-- |
| GgCOE2     | SE-----    | -----      | -----      | -ATPCIKAIS | PSEGWTGGA  | MVIIIGDNFF | DGLQVVFSTM | L-VWSE---L  | ITPHAIRVQT | PPRHIPGVVE | VTLSYKSK-- |
| XtCOE2     | SE-----    | -----      | -----      | -ATPCIKAIS | PSEGWTGGA  | MVIIIGDNFF | DGLQVVFSTM | L-VWSE---L  | ITPHAIRVQT | PPRHIPGVVE | VTLSYKSK-- |
| DrCOE2     | NETV-ENNME | Y-----     | -----      | -ATPCIKAIS | PSEGWTGGA  | MVIVIGENFF | DGLQVVFSTM | L-VWSE---L  | ITPHAIRVQT | PPRHIPGVVE | VTLSYKSK-- |
| COE3       |            |            |            |            |            |            |            |             |            |            |            |
| MmCOE3     | SE-----    | -----      | -----      | -ATPCIKAIS | PSEGWTGGA  | TVIIIGDNFF | DGLQVVFSTM | L-VWSE---L  | ITPHAIRVQT | PPRHIPGVVE | VTLSYKSK-- |
| HsCOE3     | SEGTAPSYLE | N-----     | -----      | -ATPCIKAIS | PSEGWTGGA  | TVIIIGDNFF | DGLQVVFSTM | L-VWSE---L  | ITPHAIRVQT | PPRHIPGVVE | VTLSYKSK-- |
| OaCOE3     | SEXXXXXXXX | XXXXXXXXXX | XXXXXXXXXX | XXXXXXXXXX | XXXXXXXXXX | XXXXXXXXXX | XXXXXXXXXX | XXXXXXXXXX  | XXXXXXXXXX | XXXXXXXXXX | XXXXXXXXXX |
| GgCOE3     | SEGTAPSYLE | NA-----    | -----      | -ATPCIKAIS | PSEGWTGGA  | TVIIIGDNFF | DGLQVVFSTM | L-VWSE---L  | ITPHAIRVQT | PPRHIPGVVE | VTLSYKSK-- |
| XtCOE3     | SEGTAPSYLE | NV-----    | -----      | -ATPCIKAIS | PSEGWTGGA  | TVIIIGDNFF | DGLQVVFSTM | L-VWSE---L  | ITPHAIRVQT | PPRHIPGVVE | VTLSYKSK-- |
| DrCOE3     | SEGTATPYLE | NA-----    | -----      | -ATPCIKAIS | PSEGWTGGA  | TVIIIGDNFF | DGLQVVFSTM | L-VWSE---L  | ITPHAIRVQT | PPRHIPGVVE | VTLSYKSK-- |
| EBF4       |            |            |            |            |            |            |            |             |            |            |            |
| MmEBF4     | SEA-----   | -----      | -----      | -ATPCIKAIS | PSEGWTGGA  | TVIIIGDNFF | DGLQVVFSTN | L-LWSE---L  | ITPHAIRVQT | PPRHIPGVVE | VTLSYKSK-- |
| HsEBF4     | SEA-----   | -----      | -----      | -ATPCIKAIS | PSEGWTGGA  | TVIVIGDNFF | DGLQVVFSTN | L-VWSE---L  | ITPHAIRVQT | PPRHIPGVVE | VTLSYKSK-- |
| MdEBF4     | SEA-----   | -----      | -----      | -ATPCIKAIS | PSEGWTGGA  | TVIVIGDNFF | DGLQVVFSTM | L-VWSE---L  | ITPHAIRVQT | PPRHIPGVVE | VTLSYKSK-- |
| OaEBF4     | XXXXXXXXXX | XXXXXXXXXX | XXXXXXXXXX | XXXXXXXXXX | XXXXXXXXXX | XXXXXXXXXX | XXXXXXXXXX | XXXXXXXXXX  | XXXXXXXXXX | XXXXXXXXXX | XXXXXXXXXX |
| UNASSIGNED |            |            |            |            |            |            |            |             |            |            |            |
| DrCOE      | IEA-----   | -----      | -----      | -EIPCIAIS  | PSEGWTSGGA | SVIIIGDQFF | SGLQVVFSTM | L-VWSE---V  | ITPHAIRVQT | PPRHIPGVVE | VTLSYKSK-- |

### LAMPREYS

|          |            |            |            |            |            |            |            |            |            |            |            |
|----------|------------|------------|------------|------------|------------|------------|------------|------------|------------|------------|------------|
| Pm COE-A | SE-----    | -----      | -----      | -ATPCIKAIS | PSEGWTGGA  | TVIIIGDNFF | DGLQVVFSTM | L-VWSE---L | ITPHAIRVQT | PPRHIPGVVE | VTLSYKSK-- |
| Pm COE-B | XXXXXXXXXX | XXXXXXXXXX | XXXXXXXXXX | XXXXXXXXXX | XXXXXXXXXX | XXXXXXXXXX | XXXXXXXXXX | XXXXXXXXXX | XXXXXXXXXX | XXXXXXXXXX | XXXXXXXXXX |

### NON-VERTEBRATES

|       |            |            |            |             |            |            |            |            |            |            |            |
|-------|------------|------------|------------|-------------|------------|------------|------------|------------|------------|------------|------------|
| CiCOE | SEGNFFFIES | -----      | -----      | -ASPTIKAIN  | PAEGWTGGA  | TVIVIGENFF | DGLQVVFSTM | V-VWSE---L | ITQHAIRVQT | PPRHLPGVVE | VTLSYKSK-- |
| BfCOE | SEDGEMSF   | DSPNINRGQK | -----      | -ATPCIKAIS  | PSEGWTGGA  | TVIIIGDNFF | DGLQVVFSTM | L-VWSE---L | ITPHAIRVQT | PPRHIPGVVE | VTLSYKSK-- |
| SpCOE | SEG-----   | -----      | -----      | -ATPCIKAIS  | PSEGWTGGA  | TVIIIGDNFF | DGLQVVFSTM | I-VWSE---L | ITPHAIRVQT | PPRHIPGVVE | VTLSYKSK-- |
| LgCOE | TEGGDLRFSH | LRPKLSPFAA | -----      | -TPCIIKAIC  | PSEGWTSGGT | TVIIIGDNFF | DGLQLVFGTM | L-VWSE---L | LTSHAIRVQT | PPRHIPGVVE | VTLSYKSK-- |
| CcCOE | GDAGFLCA-- | -----      | -----      | -ATPTIKAIC  | PSEGWTGGT  | TVIIIGDNFF | DGLQVVFSTM | L-VWSE---L | ITSHAIRVQT | PPRHIPGVVE | VTLSYKSK-- |
| DmCOE | TEGTGNTSLS | ISGHPLAPDS | TYDGLYPPLP | VATPCIKAIS  | PSEGWTGGA  | TVIIIGDNFF | DGLQVVFSTM | L-VWSE---L | ITSHAIRVQT | PPRHIPGVVE | VTLSYKSK-- |
| CeCOE | SDDSEYSESA | ELPS-----  | -----      | -SVPVIKALF  | PSEGWIQGGT | QVVLIGENFF | EGLQVAFGTA | SPNWGESVQL | ISPHAIRVT  | PPKHSAGPVD | VTLQYKSK-- |
| NvCOE | NEQDTSA--- | -----      | -----      | -DDPCIIKAIC | PNEGWTIGGS | NVILIGDNFF | DGLQVVFSTF | I-VWSE---F | ITPHALRVQA | PPSPMPGVVK | VYLMHKEK-- |
| AmCOE | VVGD-----  | -----      | -----      | -GKPCIVSIY  | PNEGWTGGG  | RITVIGVNF  | EGLDIVFGTV | P-VQSE---V | LSPNAIAVRT | PPATMTGEVD | VTLIFRASGA |

|                        | HELIX H1                                                                                                           | Linker | HELIX H2d  | HELIX H2A               |
|------------------------|--------------------------------------------------------------------------------------------------------------------|--------|------------|-------------------------|
| <b>GNATHOSTOMES</b>    |                                                                                                                    |        |            |                         |
| COE1                   |                                                                                                                    |        |            |                         |
| MmCOE1                 | QFCKGTPGRF IYT-ALNEPT IDYGFQRLQK VIPRHPGDPE RLPKEVILKR AADLVEALYG MPHNNQ--EI                                       |        |            | ILKRAADIAE ALYSVPRNHN   |
| HsCOE1                 | QFCKGTPGRF IYT-ALNEPT IDYGFQRLQK VIPRHPGDPE RLPKEVILKR AADLVEALYG MPHNNQ--EI                                       |        |            | ILKRAADIAE ALYSVPRNHN   |
| MdCOE1                 | QFCKGTPGRF IYT-ALNEPT IDYGFQRLQK VIPRHPGDPE RLPKEVILKR AADLVEALYG MPHNNQ--EI                                       |        |            | ILKRAADIAE ALYSVPRNHN   |
| OaCOE1                 | QFCKGTPGRF IYT-ALNEPT IDYGFQRLQK VIPRHPGDPE RLPKEVILKR AADLVEALYG MPHNNQ--EI                                       |        |            | ILKRAADIAE ALYSVPRNHN   |
| GgCOE1                 | QFCKGTPGRF IYT-ALNEPT IDYGFQRLQK VIPRHPGDPE RLPKEVILKR AADLVEALYG MPHNNQ--EI                                       |        |            | ILKRAADIAE ALYSVPRNHN   |
| XtCOE1                 | QFCKGTPGRF IYT-ALNEPT IDYGFQRLQK VIPRHPGDPE RLPKEVILKR AADLVEALYG MPHNNQ--EI                                       |        |            | ILKRAADIAE ALYSVPRNHS   |
| DrCOE1                 | QFCKGTPGRF IYT-ALNEPT IDYGFQRLQK VIPRHPGDPE RLPKEVILKR AADLVEALYG MPHNNQ--EI                                       |        |            | ILKRAADIAE ALYNVPRGHN   |
| COE2                   |                                                                                                                    |        |            |                         |
| MmCOE2                 | QFCKGAPGRF IYT-ALNEPT IDYGFQRLQK VIPRHPGDPE RLAKEMLLKR AADLVEALYG TPHNNQ--DI                                       |        |            | ILKRAADIAE ALYSVPRNPS   |
| HsCOE2                 | QFCKGAPGRF IYT-ALNEPT IDYGFQRLQK VIPRHPGDPE RLAKEMLLKR AADLVEALYG TPHNNQ--DI                                       |        |            | ILKRAADIAE ALYSVPRNPS   |
| OaCOE2                 | QFCKGAPGRF IYT--LNEPT IDYGFQRLQK VIPRHPGDPE RLAKEMLLKR AADLVEALYG TPHNNQ--DI                                       |        |            | ILKRAADIAE ALYSVPRNPS   |
| GgCOE2                 | QFCKGAPGRF IYT-ALNEPT IDYGFQRLQK VIPRHPGDPE RLAKEMLLKR AADLVEALYG TPHNNQ--DI                                       |        |            | ILKRAADIAE ALYSVPRNPA   |
| XtCOE2                 | QFCKGAPGRF IYT-ALNEPT IDYGFQRLQK VIPRHPGDPE RLAKEMLLKR AADLVEALYG TPHNNQ--DI                                       |        |            | ILKRAADIAE ALYSVPRNHN   |
| DrCOE2                 | QFCKGAPGRF IYT-ALNEPT IDYGFQRLQK LIPRHPGDPD KLAKEMLLKR AADVVESLYG NTTSNQ--DM                                       |        |            | LLKRAADIAE ALYSVPRPHS   |
| COE3                   |                                                                                                                    |        |            |                         |
| MmCOE3                 | QFCKGAPGRF VYT-ALNEPT IDYGFQRLQK VIPRHPGDPE RLPKEVLLKR AADLVEALYG MPHNNQ--EI                                       |        |            | ILKRAADIAE ALYSVPRNHN   |
| HsCOE3                 | QFCKGAPGRF VYT-ALNEPT IDYGFQRLQK VIPRHPGDPE RLPKEVLLKR AADLVEALYG MPHNNQ--EI                                       |        |            | ILKRAADIAE ALYSVPRNHN   |
| OaCOE3                 | XXXXXXXXXX XXXXXXXXXXXX XXXXXXXXXXXX XXXXXXXXXXXX XXXXXXXXXXXX XXXXXXXXXXXX XXXXXXXXXXXX XXXXXXXXXXXX XXXXXXXXXXXX |        |            | XXXXXXXXXX XXXXXXXXXXXX |
| GgCOE3                 | QFCKGAPGRF VYT-ALNEPT IDYGFQRLQK VIPRHPGDPE RLPKEVLLKR AADLVEALYG MPHNNQ--EI                                       |        |            | ILKRAADIAE ALYSVPRNHN   |
| XtCOE3                 | QFCKGAPGRF VYT-ALNEPT IDYGFQRLQK VIPRHPGDPE RLPKEVLLKR AADLVEALYG MPHNNQAKEI                                       |        |            | ILKRAADIAE ALYSVPRNHN   |
| DrCOE3                 | QFCKGAPGRF VYT-ALNEPT IDYGFQRLQK VIPRHPGDPE RLPKEVLLKR AADLVEALYG MPHNNQ--EI                                       |        |            | ILKRAADIAE ALYSVPRNHN   |
| EBF4                   |                                                                                                                    |        |            |                         |
| MmEBF4                 | QFCKGAPGRF VYT-ALNEPT IDYGFQRLQK VIPRHPGDPE RLPKEVLLKR AADLAEALYG VPSSNQ--EL                                       |        |            | LLKRAADVAE ALYSAPRAPA   |
| HsEBF4                 | QFCKGCPGRF VYT-ALNEPT IDYGFQRLQK VIPRHPGDPE RLPKEVLLKR AADLAEALYG VPGSNQ--EL                                       |        |            | LLKRAADVAE ALYSTPRAPG   |
| MdEBF4                 | QFCKGAPGRF VYT-ALNEPT IDYGFQRLQK VIPRHPGDPE RLPKEVLLKR AADLVEALYG MPHSNQ--DL                                       |        |            | ILKRAADIAE ALYSVPRTPS   |
| OaEBF4                 | XXXXXXXXXX XXXXXXXXXXXX XXXXXXXXXXXX XXXXXXXXXXXX XXXXXXXXXXXX XXXXXXXXXXXX XXXXXXXXXXXX XXXXXXXXXXXX XXXXXXXXXXXX |        |            | XXXXXXXXXX XXXXXXXXXXXX |
| UNASSIGNED             |                                                                                                                    |        |            |                         |
| DrCOE                  | QFCRGAPGRF VYT-ALNEPT IDYGFQRLQK VIPHHPGDVE RLPKEVLLKR AADLIETFYG APQNNQ--EI                                       |        |            | ILKRASDIAE ALNSIPRNPS   |
| <b>LAMPREYS</b>        |                                                                                                                    |        |            |                         |
| Pm COE-A               | QFCKGAPGRF VYT-ALNEPT IDYGFQRLQK LIPRHPGDPE RLPK-----                                                              |        | -----Q--EI | ILKRAADIAE ALYSVPRNHN   |
| Pm COE-B               | XXXXXXXXXX XXXXALNEPT IDYGFQRLQK VIPRHPGDPE RLPKEVILKR AADLVEALYG LPHYNQ--EI                                       |        |            | ILKRAADIAE ALYSMRPHQN   |
| <b>NON-VERTEBRATES</b> |                                                                                                                    |        |            |                         |
| CiCOE                  | QFCSGAPGRF VYT-ALNEPT LDYGFQRLK TVPRHPGDPE RLPK-----                                                               |        | -----EI    | ILKRAADVME AVISRQYAPP   |
| BfCOE                  | QFCKGAPGRF VYT-SLNEPT IDYGFQRLAK LVPRHPGDPE RLPK-----                                                              |        | -----EI    | ILKRAADLAE AIYSMPRNPN   |
| SpCOE                  | QFCKGAPGRF VYV-SLTEPT IDYGFQRLSK LVPRHPGDPD RLPK-----                                                              |        | -----EI    | ILKRAADLAE ALYSMRPN--   |
| LgCOE                  | QFCKGAPGRF VYT-ALTEPT IDYGFQRLMK LVPRHPGDPE KLPK-----                                                              |        | -----EI    | ILKRAADLAE ALYSMRPNHN   |
| CcCOE                  | QFCKGAPGRF VYT-ALTEPT IDYGFQRLMK LVPRHPGDPE RLPK-GICEG HVGPLSSQIF L-SCPQ--EI                                       |        |            | ILKRAADLAE ALYSMRPNPN   |
| DmCOE                  | QFCKGSPGRF VYVSALNEPT IDYGFQRLQK LIPRHPGDPE KLPK-----                                                              |        | -----EI    | ILKRAADLVE ALYSMRSPG    |
| CeCOE                  | TYSRGTPLRF SYI-TLAEPG IEYGFQRLQK LLPKYPGDPE RLPK-----                                                              |        | -----DQ    | ILKRAAEALAE ALYNRTSTES  |
| NvCOE                  | QYCKYAPAKF GYT-ALVEPT IDYGFQRLSK LIPRHPGDPE RIPK-----                                                              |        | -----EI    | VLKRAADLAE TLYQMPRTPT   |
| AmCOE                  | QFCISNPGKF LYT-APDDQI FENSFCRIER VI-RQQDDPD QLPK-----                                                              |        | -----DL    | VLQRAAEELLE SCFLSSRGA-  |

**Figure S2 : Alignment of the DBD, IPT and HLH domains of the COE proteins.** Species are indicated on the top lines with abbreviations as in Fig. 1. Additional species abbreviations : Oa, *Ornithorhynchus anatinus*; Gg, *Gallus gallus*; Sp, *Strongylocentrotus purpuratus*; Ce, *Caenorhabditis elegans*; Am, *Amphimedon queenslandica*. Highly truncated (e.g., XtCOE1, PmCOE-B, OaCOE1, OaCOE3, OaEBF4) or divergent (CeCOE, AmCOE) predicted sequences were included in this alignment. Dashes indicate missing residues. X stands for undetermined sequences. The positions correspond to the DBD, IPT, Helix 1, H2d and H2a domains are shaded in orange, yellow, green, pale blue and dark blue, respectively. The linker separating H1 and H2 is squared.
