# Supplementary material for: The metazoan history of the COE transcription factors. Selection of a variant HLH motif by mandatory inclusion of a duplicated exon in vertebrates
Source: PubMed Central journal article supplement (PMC2394523; doi:10.1186/1471-2148-8-131), 2008-05-02
Supplement: 1471-2148-8-131-S6.pdf [file 1471-2148-8-131-S6.pdf]

**Table S1**

|                         | COE1                               | COE2                               | COE3                               | COE4                               | Unassigned                                                                          |
|-------------------------|------------------------------------|------------------------------------|------------------------------------|------------------------------------|-------------------------------------------------------------------------------------|
| Mouse                   | ENSMUSG00000057098                 | ENSMUSG00000022053                 | ENSMUSG00000010476                 | ENSMUSG00000053552                 | –                                                                                   |
| Human                   | ENSG00000164330                    | ENSG00000134025                    | ENSG00000108001                    | ENSG00000088881                    | –                                                                                   |
| <i>M. domestica</i>     | ENSMODG00000008198                 | –                                  | –                                  | ENSMODG00000005256                 | –                                                                                   |
| <i>O. anatinus</i>      | <a href="#">ENSOANG00000012338</a> | <a href="#">ENSOANG00000004212</a> | <a href="#">ENSOANG00000012326</a> | <a href="#">ENSOANG00000005673</a> |                                                                                     |
| <i>G. gallus</i>        | ENSGALG00000003699                 | ENSGALG00000000242                 | ENSGALG00000010461                 |                                    |                                                                                     |
| <i>X. tropicalis</i>    | ENSXETG000000001493                | gi 38648990                        | ENSXETG000000011309                | –                                  | –                                                                                   |
| <i>D. rerio</i>         | ENSDARG00000010608                 | gi 18858451                        | ENSDARG00000003613                 | –                                  | ENSDARG00000016116                                                                  |
| <i>P. marinus</i>       | –                                  | –                                  | –                                  | –                                  | PmCOEA :<br>Scaffolds-61646-2155-7544-27354-19799-42307<br>PmCOEB :<br>Scaffold-569 |
| <i>C. intestinalis</i>  | –                                  | –                                  | –                                  | –                                  | ENSCINP00000006566                                                                  |
| <i>B. floridae</i>      | –                                  | –                                  | –                                  | –                                  | gi 45752204                                                                         |
| <i>S. purpuratus</i>    | –                                  | –                                  | –                                  | –                                  | Modification of<br>gi115905857<br>(below)                                           |
| <i>D. melanogaster</i>  | –                                  | –                                  | –                                  | –                                  | CG10197                                                                             |
| <i>C. elegans</i>       | –                                  | –                                  | –                                  | –                                  | Y16B4A.1                                                                            |
| <i>L. gigantea</i>      | –                                  | –                                  | –                                  | –                                  | jgi Lotgi1 225788<br>estExt<br>Genewise1Plus C<br>sca 1500019                       |
| <i>C. capitata</i>      | –                                  | –                                  | –                                  | –                                  | jgi Capca1 93575<br>e gw1 31 157 1                                                  |
| <i>N. vectensis</i>     | –                                  | –                                  | –                                  | –                                  | jgi Nemve1<br>164975                                                                |
| <i>A. queenslandica</i> | –                                  | –                                  | –                                  | –                                  | Amq16                                                                               |

**Identification of the metazoan COE sequences used in this study**

COE genes included in this study are identified by their Genbank accession numbers or Ensembl identification numbers when available. In the lamprey *P. marinus*, the scaffolds containing COE sequences are indicated by their number in the current Pre-Ensembl genome version. In *A. queenslandica*, the sequence used is the Geneid prediction, reported by Simionato et al. 2007. BMC Evol. Biol. 7, 33. All the gnathostome sequences could be assigned to one of the four COE1-4 classes and are thus indicated in the corresponding column, except one zebrafish sequence, included in the last column (unassigned sequences). Similarly, the lamprey and non-vertebrate sequences, which do not show any relationship to either of the gnathostome classes, are identified in the last column. The sea urchin *S. purpuratus* used in this study (see below) was manually predicted : it can be readily aligned with other deuterostome COE proteins over the whole length of the protein (similarities underlined below), unlike the automated prediction gi115905857, which appears erroneous in the C-terminal part of the molecule. The sea urchin *S. purpuratus* COE sequence used in this study was manually predicted at the level of the linker-Helix1-Helix2 domains, which leads to a modification of the automated prediction gi115905857. The novel predicted protein sequence is (with successive exons shaded in gray and yellow):

atgttcgggatccaggattcattgacgaggggttctaccaacctcaaagaggaaccaata

M F G I Q D S L T R G S T N L K E E P I

atcacggcggaggtcggatcggctgccgttagagtcggctggatgcagccaaccatggtg

I T A E V G S A A V R V G W M Q P T M V

gatcaaaagtgccagttcgtgtgggatggcccgagcacacttcgagaaacaacccccgagt

D Q S A S S C G M A R A H F E K Q P P S

aatttacgaaagagtaacttctccatttcgtgatcgcgctctacgaccgagcaggtcaa

N L R K S N F F H F V I A L Y D R A G Q

cccatcgaagtcgagaggacatccttcgttgatttcacgaaaagaaagggagccagac

P I E V E R T S F V D F I E K E R E P D

gctacgaagacaacaatggcattcactaccgtatacaaatgttatttcacaatggagtg

A T K T N N G I H Y R I Q M L F H N G V

cgaacggagcaggatctctatgtgagacttatcgactctatgacgaaacaggccatcata

R T E Q D L Y V R L I D S M T K Q A I I

tatgaaggacaggacaagaatccagagatgtgtcgtgtgctactcactcacgaaatcatg

Y E G Q D K N P E M C R V L L T H E I M

tcgagccgctgctgtgacaagaaagctgtggcaatagaaacgagactccatctgatccg

C S R C C D K K S C G N R N E T P S D P

gtaatcatcgacagatttttcctcaagttcttctcaagtgcaaccagaactgcttga

V I I D R F F L K F F L K C N Q N C L K

aatgcaggggaatccaagagatagcgtcgatttcaggtgggttatatctacaactccaaac

N A G N P R D M R R F Q V V I S T T P N

gttgatggatcatgtgctggccatgtccgataacatggttgacacaacaactccaaacac

V D G H V L A M S D N M F V H N N S K H

ggccggagagcgaagaagacttgaccatctgaaggagctacgccgtgcatcaaggcaatc

G R R A R R L D P S E G A T P C I K A I

agccctagcgaaggatggacaacagggggcgcactgtcatcatcgtcggcgacaacttc

S P S E G W T T G G A T V I I V G D N F

ttcgacggactccaggtcgtctttggcagcatgatcgtctggagtgagctcatcacc

F D G L Q V V F G S M I V W S E L I T P

cacgccatcagagtacaacccccaccccgacacatccccgggtggagggtcacattg

H A I R V Q T P P R H I P G V V E V T L

tcgtacaagtcgaagcagttctgcaagggggcgcaggcagggttcgtctacgtctcactg

S Y K S K Q F C K G A P G R F V Y V S L

acagagccgacaatagattacgggttccaaagactgagcaagcttgcccgccatcct

T E P T I D Y G F Q R L S K L V P R H P

ggcgatccagatagactgccaaggaatcattctgaagcgagcagcgatctg

G D P D R L P **K** E I I L K R A A D L

gcagaggccttgtatagtatgccaaggaatcaactccccattgggccgccccgatcacc

A E A L Y S M P R N Q L P I G P P R S P

gccctcaacaacagctcggtagtctagtaccatgaactcttccggtagccagctagaa

A L N N S S G S L V P M N S F G S Q L E

cagaaagtgaccaacattcaggatggaattccagcacatctgctatcctcctcctctg

H E S D Q H S **G** W N S S T S A I L L L L

tgctattgcctcctgcaagccaaggaagtccaagctgcgtcagcaaaagtgccatt

C L L P P A S Q G K S K A A S A K V S I

tcttcagctctctcgagggttattcaatttcagaagacaggagggagtattcaagcattc

S S A L S R V I Q F Q K T G G S I Q A F

ctcgacaacacaaaagagaccaaggtcaaccgttccttctggcaattggcaattccaag

L D N T K E T K S Q P F L L A I G N S K

gcccgaatcaccaactacatgatcattgtggatcacaaggccattccatgttcggcacgc

A R I T N Y M I I V D H K A I P C S A R

acggtcgaagcagcagtagatttactcttcaagaccactttgtctttggcctgcagtac

T V E A A V D L L F K T H F V F G L Q Y

tgcttgtctctcgggcagttctggacttttgtccagactgccatttttgaatcgatadc

C L S L R Q F W T F V Q T A I F E I D I

ggagtgctccgggaaacaccaagagtatacgtgaaattagatcgaaattgtag

G V S R E T P R V Y V K L D R N C -
